# Supplementary material for: Trace amount CuII(ppm) and mixture design of CuII/PdIIcatalyzed Suzuki cross-coupling reactions based on the cooperative interaction of metal with a conjugated pyridylspirobifluorene
Source: Royal Society of Chemistry journal article supplement (doi:10.1039/c5ta00222b), 2015-01-01

Electronic Supplementary Information

**Trace Amount Cu<sup>II</sup>(ppm) and Mixture Design of Cu<sup>II</sup>/Pd<sup>II</sup> Catalyzed Suzuki Cross-Coupling Reactions Based on Cooperative Interaction of Metal with a Conjugated Pyridylspirobifluorene**

Xing Li,<sup>\*a</sup> Jie Zhang,<sup>a,b</sup> Yayun Zhao,<sup>a</sup> Xiuhua Zhao,<sup>a</sup> Feng Li,<sup>b</sup> Taohai Li,<sup>\*b</sup> H. L. Li<sup>c</sup> and Liang Chen<sup>c</sup>

<sup>a</sup> State Key Laboratory Base of Novel Functional Materials and Preparation Science, Faculty of Materials Science and Chemical Engineering, Ningbo University, Ningbo, 315211, P.R. China

<sup>b</sup> College of Chemistry, Xiangtan University, Xiangtan 411105, P.R. China

<sup>c</sup> Ningbo Institute of Materials Technology and Engineering, Zhejiang, Ningbo, 315211, P.R. China

\* Corresponding author E-mail addresses: [lixing@nbu.edu.cn](mailto:lixing@nbu.edu.cn)

## EXPERIMENTAL SECTION

**Materials and Methods.** All catalysis coupling reactions were carried out under air atmosphere. All other synthetic reactions were performed by using standard Schlenk techniques utilizing a double-manifold vacuum system with high purity nitrogen flow. Poly(ethylenimine) (abbreviated as PEI) was purchased from Aldrich Chemical Company. All solutions were prepared with doubly-distilled water. All reagents were of analytical grade and used as received without further purification.

**Physical Measurements.** Infra-red spectra were recorded on a Nicolet Avatar FTIR spectrophotometer in the range 4000-400  $\text{cm}^{-1}$ . NMR spectra were obtained from solutions in  $\text{CDCl}_3$  using Bruker DRX-400 spectrometers. Gas chromatography-mass spectrometry (GC-MS) was performed on a 430 GC (Varian, USA). UV-vis absorption spectra were recorded on a quartz slide using a Lambda35 spectrophotometer (Perkin Elmer, USA). Atomic force microscope (AFM) images were taken on a single-crystal silicon slide using a Veeco Multimode NS3A-02NanoscopeIII atomic force microscope with silicon tips. Height images of the films were recorded using tapping-mode AFM. Analysis of Pd content was measured by inductively coupled plasma-atomic emission spectroscopy (ICP-AES) using Ultima. Transmission electron microscopy (TEM) images were obtained by Tecnai G2 F20 S-TWIN. Scanning electron microscopy (SEM) images were taken with SU-70 field-emission scanning electron microscope. Energy dispersive X-ray spectra (EDS) were carried out on a Carl Zeiss model Ultra 55 microscope. Powder X-ray diffraction (PXRD) data were collected on a Bruker D8 Focus X-ray diffractometer using  $\text{Cu K}\alpha$  radiation.

**Synthesis the complex of 2,2',7,7'-tetra-(4-pyridyl)-9,9'-spirobifluorene.** A mixture of 2,2',7,7'-tetrabromo-9,9'-spirobifluorene (1.5 mmol), pyridine-4-boronic acid (9.0 mmol),  $\text{K}_2\text{CO}_3$  (30 mmol),  $\text{Pd}(\text{PPh}_3)_4$  (0.15 mmol) were dissolved in toluene/EtOH/ $\text{H}_2\text{O}$  (80/40/20 mL). The mixture was refluxed under  $\text{N}_2$  for 48 h, cooled to the room temperature, and then extracted with  $\text{CH}_2\text{Cl}_2$ . The combined organic phase was dried with anhydrous  $\text{MgSO}_4$ , and concentrated by evaporation under reduced pressure. The obtained sample was purified by column chromatography. The psf was obtained, yield 75%. Recrystallized from  $\text{CH}_2\text{Cl}_2$  / DMF.  $^1\text{H}$  NMR ( $\text{CDCl}_3$ , 400 MHz): 8.533-8.547 (d, 8H,  $-\text{C}_5\text{H}_4\text{N}$ ), 8.061-8.081 (d, 4H,  $-\text{C}_6\text{H}_3$ ), 7.780-7.760 (d, 4H,  $-\text{C}_6\text{H}_3$ ), 7.365-7.380 (d, 8H,  $-\text{C}_5\text{H}_4\text{N}$ ), 7.066ppm (s, 4H,  $-\text{C}_6\text{H}_3$ );  $^{13}\text{C}$  NMR ( $\text{CDCl}_3$ , 100 MHz):  $\delta = 150.01(\text{C})$ ,

149.50(C), 147.68(C), 141.96(C), 138.52(C), 127.54(CH), 122.54(CH), 121.46(CH), 121.37(CH), 66.15(C<sub>spiro</sub>) ppm. MS (ESI): m/z calcd for C<sub>45</sub>H<sub>28</sub>N<sub>4</sub>: 624.4; found 625.4 (M + H<sup>+</sup>).

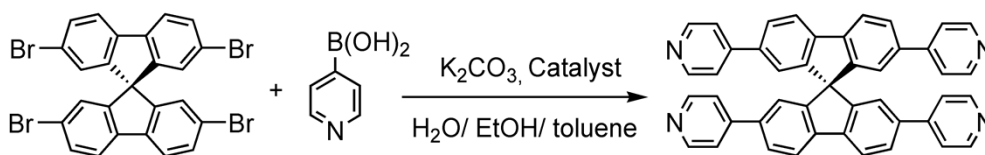

Scheme S1. Synthesis schematic diagram of the psf ligand.

**X-ray Crystallography.** Data collection for psf was performed on a Bruker-AXS diffractometer equipped with a graphite monochromated Mo-K $\alpha$  radiation ( $\lambda = 0.71073 \text{ \AA}$ ) at 293K. All absorption corrections were applied using the SADABS program. The structure was solved by direct methods, the metal atom was located from the E-map, and other non-hydrogen atoms were derived from the successive difference Fourier syntheses. All non-hydrogen atoms were refined anisotropically, while the hydrogen atoms were generated geometrically and refined with isotropic thermal parameters. The structure was refined on  $F^2$  by full-matrix least-squares using the SHELXTL-97 program package. The crystallographic data of psf were listed in Table S1 and the selected bond lengths and angles in Table S2. Crystallographic data (excluding structure factors) for psf have been deposited at the Cambridge Crystallographic Data Center as supplementary publications. CCDC-982005 for the psf ligand contains the crystallographic data. The data can be obtained free of charge at [www.ccdc.cam.ac.uk/conts/retrieving.html](http://www.ccdc.cam.ac.uk/conts/retrieving.html) [or from the Cambridge Crystallographic Data Centre, 12, Union Road, Cambridge CB2 1EZ, UK; E-mail: [deposit@ccdc.cam.ac.uk](mailto:deposit@ccdc.cam.ac.uk)].

**Preparation of Combination (Pd/psf) Nanoparticles.** The ethanol solution of psf (5.0 mmol/L, 1.0 mL) was added to aqueous solution of PdCl<sub>2</sub> (5.0 mmol/L, 1.0 mL), then the mixture was stirred at 90 °C for 10h until a pale yellow suspension was obtained. The suspension was centrifuged, washed with water and ethanol, dried for SEM. The size of the nanoparticles was determined by SEM.

**Preparation of Combination (Cu/psf) Sheets.** A mixture of Cu(NO<sub>3</sub>)<sub>2</sub>·6H<sub>2</sub>O (0.03mmol), psf (0.03mmol), EtOH (1.0 mL) and H<sub>2</sub>O (1.0 mL) was stirred for appropriate time under ambient atmosphere. Cu(NO<sub>3</sub>)<sub>2</sub>/psf nanoparticles were prepared, separated, washed three times with water and ethanol, and dried in the air for SEM. The size of the sheets was determined by SEM.

**Preparation of Combination (Cu/Pd/psf) Composites.** A mixture of  $\text{Cu}(\text{NO}_3)_2 \cdot 6\text{H}_2\text{O}$  (0.15mmol),  $\text{PdCl}_2$  (0.15mmol), psf (0.03mmol), EtOH (1.0 mL) and  $\text{H}_2\text{O}$  (1.0 mL) was stirred for 10h under ambient atmosphere, and then blue colloidal suspension was obtained, separated, washed with water and ethanol, and dried in the air for SEM.

**Layer-by-Layer Assembly of Multilayer Films.** The quartz sheets were treated with a mixture solution ( $\text{H}_2\text{SO}_4 / 30 \% \text{H}_2\text{O}_2 = 6:4$ ; Caution: this solution is an extremely dangerous corrosive and should be handled with care using appropriate personal protection) at  $70^\circ\text{C}$  for 30min, followed by thoroughly washing with distilled water and drying under nitrogen flow. Further purification was carried out by immersion in a  $\text{H}_2\text{O} / \text{H}_2\text{O}_2 / \text{NH}_4\text{OH}$  (5:1:1) (V/V/V) bath for 30 min at  $70^\circ\text{C}$ . The clean quartz sheets were first immersed in PEI solution for 10 min. Then the sheets were deposited into  $\text{Cu}(\text{NO}_3)_2$  solution (3.0 mmol / L) for 10 min. The sheets coated with PEI- $\text{Cu}^{2+}$  were immersed in the ethanol solution of the psf for 10 min. By repeating the steps above, PEI- $[\text{Cu}(\text{NO}_3)_2/\text{psf}]_n$  multilayer films were prepared. Between each immersion step, the substrates were dried with nitrogen stream at room temperature.

**Analysis of Cu-loadings in PEI- $[\text{Cu}(\text{NO}_3)_2/\text{psf}]_{10}$  Film.** The amount of copper in the PEI- $[\text{Cu}(\text{NO}_3)_2/\text{psf}]_{10}$  was determined as follows: the quartz sheet loaded with PEI- $[\text{Cu}(\text{NO}_3)_2/\text{psf}]_{10}$  was put into a NaOH aqueous solution (0.5 mM, 10 mL), and UV-vis spectra were used to monitor the absorbance; when the quartz sheet exhibited no absorbance, indicating the PEI- $(\text{Cu}^{2+}/\text{psf})_{10}$  film was completely desorbed into the aqueous solution, and the solution was used for analysis of Cu-content by ICP ( $8.7\mu\text{g}$ ,  $1.4 \times 10^{-5}$  mol%).

**Application of Catalysts for Suzuki Reaction.** The Suzuki cross-coupling reaction was performed by using the slide coated with PEI- $[\text{Cu}(\text{NO}_3)_2/\text{psf}]_n$  multilayer films as catalysts, in which the coated slide was submerged to the reaction mixture in a small pressure-proof vial with a magnetic bar (Scheme 2). In this reaction, the general procedure was as follows: the mixture of aryl boronic acid or its derivative (1.2 mmol), aryl halide (1.0 mmol),  $\text{K}_2\text{CO}_3$  (3.0 mmol), catalyst  $\text{H}_2\text{O}$  and EtOH and was put into a vial. Then the mixture was heated to an appropriate temperature for a certain time with vigorously stirring. At the end of the reaction, the mixture was cooled and extracted with ethyl acetate (10 mL) for three times. The organic phase was collected, washed with saturated brine and dried by anhydrous sodium sulfate.

After removal of the solvent, the residue was purified by column chromatography on silica gel.  $^1\text{H}$  NMR (400 MHz) and  $^{13}\text{C}$  NMR (100 MHz) spectra were recorded in  $\text{CDCl}_3$  solution (SM).

**IR, MS,  $^1\text{H}$  NMR,  $^{13}\text{C}$  NMR of the psf ligand.**

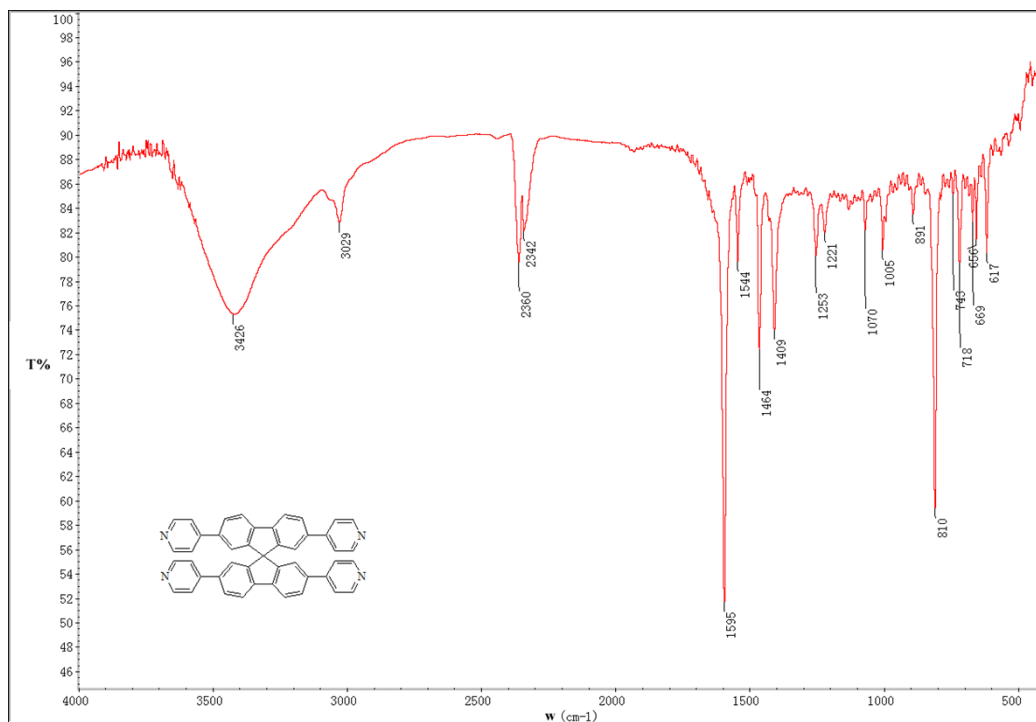

**Fig. S1.** FTIR spectrum of the psf ligand

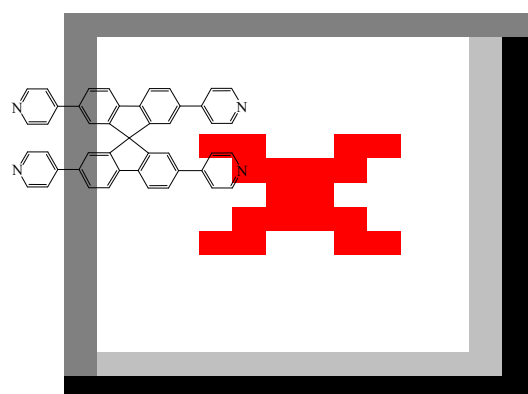

**Fig. S2.** Mass spectrogram of the psf ligand

20140605028001 CDC13 1H

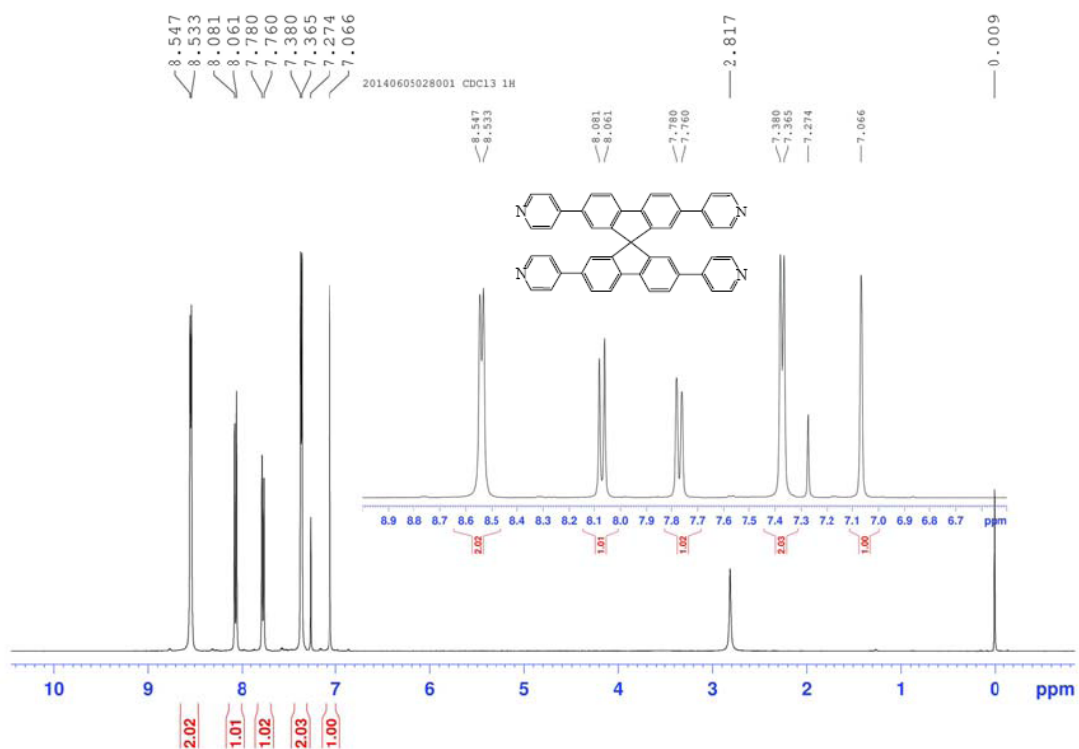

Fig. S3. <sup>1</sup>H NMR spectrum of the psf ligand.

20140605028002 CDC13 13C

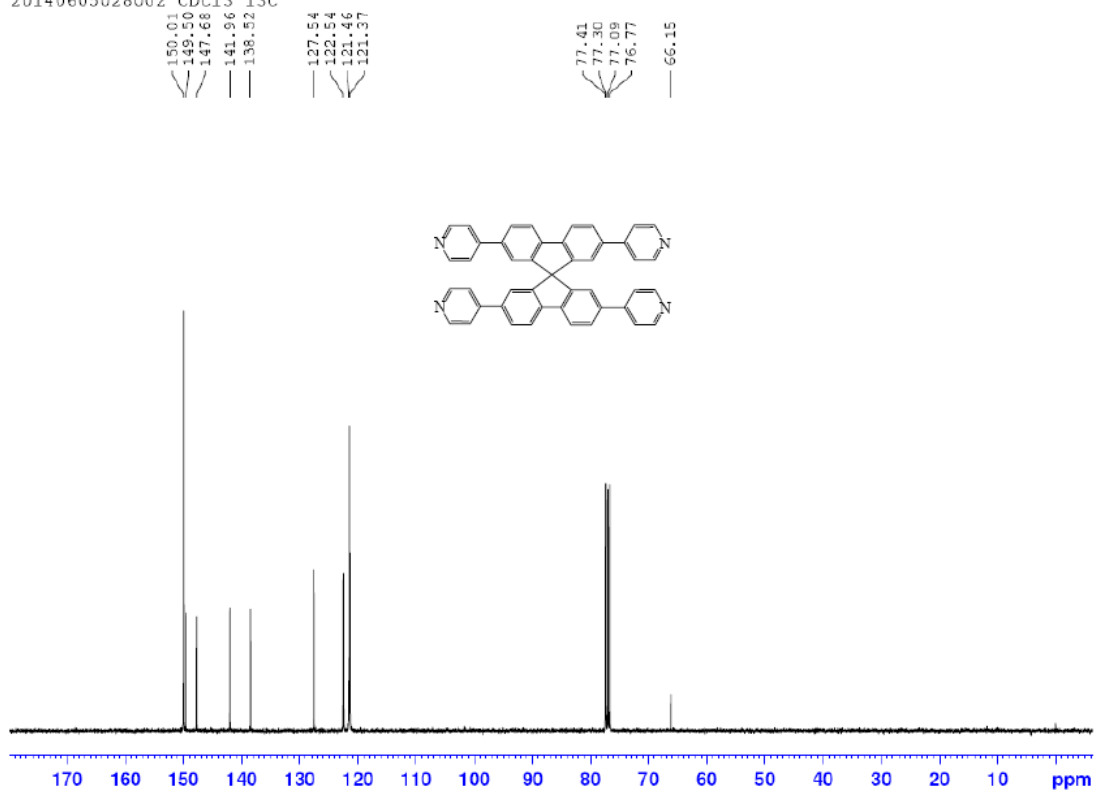

**Fig. S4.**  $^{13}\text{C}$  NMR spectrum of the psf ligand.**Table S1.** Crystal data and structure refinement for psf.

|                                                     |                                                                       |                        |
|-----------------------------------------------------|-----------------------------------------------------------------------|------------------------|
| Identification code                                 | psf·(H <sub>2</sub> O) <sub>5</sub> (CH <sub>3</sub> OH) <sub>4</sub> |                        |
| Empirical formula                                   | C <sub>94</sub> H <sub>82</sub> N <sub>8</sub> O <sub>9</sub>         |                        |
| Formula weight                                      | 1467.70                                                               |                        |
| Temperature (K)                                     | 293(2)                                                                |                        |
| Wavelength (Å)                                      | 0.71073                                                               |                        |
| Crystal system                                      | Triclinic                                                             |                        |
| space group                                         | <i>P</i> -1                                                           |                        |
| Unit cell dimensions                                | <i>a</i> = 14.285(9) Å                                                | $\alpha$ = 69.009(9) ° |
|                                                     | <i>b</i> = 15.991(10) Å                                               | $\beta$ = 71.138(8) °  |
|                                                     | <i>c</i> = 20.393(12) Å                                               | $\gamma$ = 88.044(9) ° |
| Volume (Å <sup>3</sup> )                            | 4098(4)                                                               |                        |
| <i>Z</i>                                            | 2                                                                     |                        |
| Calculated density (Mg/m <sup>3</sup> )             | 1.168                                                                 |                        |
| Absorption coefficient (mm <sup>-1</sup> )          | 0.076                                                                 |                        |
| F(000)                                              | 1496                                                                  |                        |
| Crystal size (mm)                                   | 0.24 x 0.12 x 0.08                                                    |                        |
| Theta range for data collection (°)                 | 1.42 to 27.33                                                         |                        |
| Limiting indices                                    | -18 ≤ <i>h</i> ≤ 17, -20 ≤ <i>k</i> ≤ 20, -26 ≤ <i>l</i> ≤ 25         |                        |
| Reflections collected / unique                      | 35481 / 18001 [ <i>R</i> <sub>(int)</sub> = 0.0930]                   |                        |
| Completeness to theta = 27.33                       | 97.3 %                                                                |                        |
| Max. and min. transmission                          | 0.9939 and 0.9819                                                     |                        |
| Refinement method                                   | Full-matrix least-squares on <i>F</i> <sup>2</sup>                    |                        |
| Data / restraints / parameters                      | 18001 / 0 / 2                                                         |                        |
| Goodness-of-fit on <i>F</i> <sup>2</sup>            | 0.939                                                                 |                        |
| Final <i>R</i> indices [ <i>I</i> > 2σ( <i>I</i> )] | <i>R</i> <sub>1</sub> = 0.1108, <i>wR</i> <sub>2</sub> = 0.2906       |                        |
| <i>R</i> indices (all data)                         | <i>R</i> <sub>1</sub> = 0.2907, <i>wR</i> <sub>2</sub> = 0.3963       |                        |
| Extinction coefficient                              | 0.0070(12)                                                            |                        |
| Largest diff. peak and hole (e. Å <sup>-3</sup> )   | 0.914 and -0.270                                                      |                        |

**Table S2.** Selected bond lengths [Å] and angles [°] for psf.

|             |        |              |        |              |        |
|-------------|--------|--------------|--------|--------------|--------|
| O(1)-O(3)#1 | 1.5605 | O(1)-C(91)   | 1.7673 | O(2)-C(92)   | 1.5958 |
| O(2)-O(6)#2 | 1.7432 | O(3)-O(1)#1  | 1.5605 | O(3)-C(93)   | 1.6905 |
| O(4)-C(94)  | 1.3750 | O(4)-O(9)#3  | 1.5555 | O(5)-C(94)#4 | 1.4779 |
| O(6)-O(2)#5 | 1.7432 | O(7)-C(94)#6 | 1.1633 | O(8)-O(9)#3  | 1.3742 |
| O(9)-O(8)#3 | 1.3742 | O(9)-O(4)#3  | 1.5555 | N(1)-C(1)    | 1.3296 |
| N(1)-C(3)   | 1.3409 | N(2)-C(18)   | 1.2918 | N(2)-C(19)   | 1.3359 |
| N(3)-C(30)  | 1.3172 | N(3)-C(29)   | 1.3192 | N(4)-C(41)   | 1.3297 |
| N(4)-C(42)  | 1.3388 | N(5)-C(46)   | 1.3507 | N(5)-C(48)   | 1.3587 |
| N(6)-C(64)  | 1.3297 | N(6)-C(63)   | 1.3581 | N(7)-C(75)   | 1.3114 |

|                   |        |                    |        |                   |        |
|-------------------|--------|--------------------|--------|-------------------|--------|
| N(7)-C(74)        | 1.3261 | N(8)-C(87)         | 1.3322 | N(8)-C(86)        | 1.3338 |
| C(1)-C(2)         | 1.3821 | C(2)-C(5)          | 1.3948 | C(3)-C(4)         | 1.3980 |
| C(4)-C(5)         | 1.4030 | C(5)-C(6)          | 1.4770 | C(6)-C(7)         | 1.3825 |
| C(6)-C(9)         | 1.4134 | C(7)-C(8)          | 1.3833 | C(8)-C(11)        | 1.3766 |
| C(9)-C(10)        | 1.3912 | C(10)-C(11)        | 1.3964 | C(10)-C(23)       | 1.5372 |
| C(11)-C(12)       | 1.4787 | C(12)-C(13)        | 1.3953 | C(12)-C(22)       | 1.3956 |
| C(13)-C(14)       | 1.3811 | C(14)-C(15)        | 1.4060 | C(15)-C(21)       | 1.4126 |
| C(15)-C(16)       | 1.4807 | C(16)-C(20)        | 1.3673 | C(16)-C(17)       | 1.3940 |
| C(17)-C(18)       | 1.4054 | C(19)-C(20)        | 1.3908 | C(21)-C(22)       | 1.3690 |
| C(22)-C(23)       | 1.5399 | C(23)-C(45)        | 1.5267 | C(23)-C(24)       | 1.5327 |
| C(24)-C(34)       | 1.3880 | C(24)-C(25)        | 1.3892 | C(25)-C(26)       | 1.4024 |
| C(26)-C(32)       | 1.3922 | C(26)-C(27)        | 1.5087 | C(27)-C(28)       | 1.3869 |
| C(27)-C(31)       | 1.4087 | C(28)-C(29)        | 1.3665 | C(30)-C(31)       | 1.3630 |
| C(32)-C(33)       | 1.3746 | C(33)-C(34)        | 1.3946 | C(34)-C(35)       | 1.4826 |
| C(35)-C(36)       | 1.3839 | C(35)-C(45)        | 1.4268 | C(36)-C(37)       | 1.3616 |
| C(37)-C(38)       | 1.4099 | C(38)-C(44)        | 1.4055 | C(38)-C(39)       | 1.4887 |
| C(39)-C(40)       | 1.3835 | C(39)-C(43)        | 1.4069 | C(40)-C(41)       | 1.3560 |
| C(42)-C(43)       | 1.3720 | C(44)-C(45)        | 1.3712 | C(46)-C(47)       | 1.3454 |
| C(47)-C(50)       | 1.3932 | C(48)-C(49)        | 1.3605 | C(49)-C(50)       | 1.4267 |
| C(50)-C(51)       | 1.4837 | C(51)-C(52)        | 1.3914 | C(51)-C(54)       | 1.4197 |
| C(52)-C(53)       | 1.3847 | C(53)-C(56)        | 1.3810 | C(54)-C(55)       | 1.3743 |
| C(55)-C(56)       | 1.3956 | C(55)-C(68)        | 1.5409 | C(56)-C(57)       | 1.4676 |
| C(57)-C(58)       | 1.3933 | C(57)-C(67)        | 1.4008 | C(58)-C(59)       | 1.3915 |
| C(59)-C(60)       | 1.4168 | C(60)-C(66)        | 1.3979 | C(60)-C(61)       | 1.4666 |
| C(61)-C(65)       | 1.3474 | C(61)-C(62)        | 1.3920 | C(62)-C(63)       | 1.3600 |
| C(64)-C(65)       | 1.3951 | C(66)-C(67)        | 1.3900 | C(67)-C(68)       | 1.5319 |
| C(68)-C(90)       | 1.5309 | C(68)-C(69)        | 1.5383 | C(69)-C(70)       | 1.3835 |
| C(69)-C(79)       | 1.3913 | C(70)-C(71)        | 1.4254 | C(71)-C(77)       | 1.3979 |
| C(71)-C(72)       | 1.4570 | C(72)-C(76)        | 1.3907 | C(72)-C(73)       | 1.3957 |
| C(73)-C(74)       | 1.3891 | C(75)-C(76)        | 1.4136 | C(77)-C(78)       | 1.4018 |
| C(78)-C(79)       | 1.3791 | C(79)-C(80)        | 1.4698 | C(80)-C(81)       | 1.3903 |
| C(80)-C(90)       | 1.4095 | C(81)-C(82)        | 1.3714 | C(82)-C(83)       | 1.3883 |
| C(83)-C(89)       | 1.4148 | C(83)-C(84)        | 1.5113 | C(84)-C(85)       | 1.3763 |
| C(84)-C(88)       | 1.3974 | C(85)-C(86)        | 1.3724 | C(87)-C(88)       | 1.3836 |
| C(89)-C(90)       | 1.3777 | C(94)-O(7)#6       | 1.1633 | C(94)-O(5)#4      | 1.4779 |
|                   |        |                    |        |                   |        |
| O(3)#1-O(1)-C(91) | 128.9  | C(92)-O(2)-O(6)#2  | 110.4  | O(1)#1-O(3)-C(93) | 96.6   |
| C(94)-O(4)-O(9)#3 | 126.4  | O(8)#3-O(9)-O(4)#3 | 117.1  | C(1)-N(1)-C(3)    | 115.8  |
| C(18)-N(2)-C(19)  | 115.3  | C(30)-N(3)-C(29)   | 114.8  | C(41)-N(4)-C(42)  | 115.0  |
| C(46)-N(5)-C(48)  | 115.6  | C(64)-N(6)-C(63)   | 114.0  | C(75)-N(7)-C(74)  | 115.9  |
| C(87)-N(8)-C(86)  | 116.3  | N(1)-C(1)-C(2)     | 124.5  | C(1)-C(2)-C(5)    | 119.8  |
| N(1)-C(3)-C(4)    | 124.6  | C(3)-C(4)-C(5)     | 118.5  | C(2)-C(5)-C(4)    | 116.8  |
| C(2)-C(5)-C(6)    | 121.1  | C(4)-C(5)-C(6)     | 122.0  | C(7)-C(6)-C(9)    | 118.4  |
| C(7)-C(6)-C(5)    | 120.6  | C(9)-C(6)-C(5)     | 121.0  | C(6)-C(7)-C(8)    | 122.3  |
| C(11)-C(8)-C(7)   | 119.2  | C(10)-C(9)-C(6)    | 119.4  | C(9)-C(10)-C(11)  | 120.5  |
| C(9)-C(10)-C(23)  | 129.0  | C(11)-C(10)-C(23)  | 110.4  | C(8)-C(11)-C(10)  | 120.2  |
| C(8)-C(11)-C(12)  | 131.3  | C(10)-C(11)-C(12)  | 108.5  | C(13)-C(12)-C(22) | 119.7  |
| C(13)-C(12)-C(11) | 131.3  | C(22)-C(12)-C(11)  | 108.8  | C(14)-C(13)-C(12) | 118.7  |
| C(13)-C(14)-C(15) | 122.7  | C(14)-C(15)-C(21)  | 116.9  | C(14)-C(15)-C(16) | 121.1  |
| C(21)-C(15)-C(16) | 121.7  | C(20)-C(16)-C(17)  | 115.6  | C(20)-C(16)-C(15) | 121.6  |



|                   |       |                     |       |                   |       |
|-------------------|-------|---------------------|-------|-------------------|-------|
| C(17)-C(16)-C(15) | 122.8 | C(16)-C(17)-C(18)   | 120.3 | N(2)-C(18)-C(17)  | 124.0 |
| N(2)-C(19)-C(20)  | 125.4 | C(16)-C(20)-C(19)   | 119.3 | C(22)-C(21)-C(15) | 120.7 |
| C(21)-C(22)-C(12) | 121.1 | C(21)-C(22)-C(23)   | 128.7 | C(12)-C(22)-C(23) | 110.2 |
| C(45)-C(23)-C(24) | 102.1 | C(45)-C(23)-C(10)   | 118.8 | C(24)-C(23)-C(10) | 109.5 |
| C(45)-C(23)-C(22) | 113.0 | C(24)-C(23)-C(22)   | 112.9 | C(10)-C(23)-C(22) | 100.9 |
| C(34)-C(24)-C(25) | 121.7 | C(34)-C(24)-C(23)   | 111.1 | C(25)-C(24)-C(23) | 127.1 |
| C(24)-C(25)-C(26) | 118.3 | C(32)-C(26)-C(25)   | 118.7 | C(32)-C(26)-C(27) | 121.7 |
| C(25)-C(26)-C(27) | 119.6 | C(28)-C(27)-C(31)   | 114.9 | C(28)-C(27)-C(26) | 122.9 |
| C(31)-C(27)-C(26) | 122.1 | C(29)-C(28)-C(27)   | 120.1 | N(3)-C(29)-C(28)  | 125.2 |
| N(3)-C(30)-C(31)  | 125.6 | C(30)-C(31)-C(27)   | 119.4 | C(33)-C(32)-C(26) | 123.4 |
| C(32)-C(33)-C(34) | 117.5 | C(24)-C(34)-C(33)   | 120.3 | C(24)-C(34)-C(35) | 108.8 |
| C(33)-C(34)-C(35) | 130.9 | C(36)-C(35)-C(45)   | 118.9 | C(36)-C(35)-C(34) | 132.7 |
| C(45)-C(35)-C(34) | 108.4 | C(37)-C(36)-C(35)   | 120.5 | C(36)-C(37)-C(38) | 121.3 |
| C(44)-C(38)-C(37) | 118.9 | C(44)-C(38)-C(39)   | 120.0 | C(37)-C(38)-C(39) | 121.1 |
| C(40)-C(39)-C(43) | 115.5 | C(40)-C(39)-C(38)   | 122.8 | C(43)-C(39)-C(38) | 121.7 |
| C(41)-C(40)-C(39) | 120.5 | N(4)-C(41)-C(40)    | 125.1 | N(4)-C(42)-C(43)  | 124.6 |
| C(42)-C(43)-C(39) | 119.3 | C(45)-C(44)-C(38)   | 119.6 | C(44)-C(45)-C(35) | 120.7 |
| C(44)-C(45)-C(23) | 129.4 | C(35)-C(45)-C(23)   | 109.7 | C(47)-C(46)-N(5)  | 124.6 |
| C(46)-C(47)-C(50) | 120.6 | N(5)-C(48)-C(49)    | 123.9 | C(48)-C(49)-C(50) | 119.5 |
| C(47)-C(50)-C(49) | 115.8 | C(47)-C(50)-C(51)   | 121.8 | C(49)-C(50)-C(51) | 122.4 |
| C(52)-C(51)-C(54) | 117.7 | C(52)-C(51)-C(50)   | 120.9 | C(54)-C(51)-C(50) | 121.3 |
| C(53)-C(52)-C(51) | 122.3 | C(56)-C(53)-C(52)   | 119.1 | C(55)-C(54)-C(51) | 119.9 |
| C(54)-C(55)-C(56) | 120.9 | C(54)-C(55)-C(68)   | 128.1 | C(56)-C(55)-C(68) | 111.0 |
| C(53)-C(56)-C(55) | 120.0 | C(53)-C(56)-C(57)   | 131.5 | C(55)-C(56)-C(57) | 108.5 |
| C(58)-C(57)-C(67) | 120.4 | C(58)-C(57)-C(56)   | 130.6 | C(67)-C(57)-C(56) | 108.9 |
| C(59)-C(58)-C(57) | 118.1 | C(58)-C(59)-C(60)   | 122.7 | C(66)-C(60)-C(59) | 117.6 |
| C(66)-C(60)-C(61) | 121.6 | C(59)-C(60)-C(61)   | 120.7 | C(65)-C(61)-C(62) | 116.0 |
| C(65)-C(61)-C(60) | 121.7 | C(62)-C(61)-C(60)   | 122.3 | C(63)-C(62)-C(61) | 121.1 |
| N(6)-C(63)-C(62)  | 123.8 | N(6)-C(64)-C(65)    | 125.1 | C(61)-C(65)-C(64) | 120.0 |
| C(67)-C(66)-C(60) | 120.4 | C(66)-C(67)-C(57)   | 120.8 | C(66)-C(67)-C(68) | 128.4 |
| C(57)-C(67)-C(68) | 110.8 | C(90)-C(68)-C(67)   | 117.3 | C(90)-C(68)-C(69) | 101.7 |
| C(67)-C(68)-C(69) | 114.2 | C(90)-C(68)-C(55)   | 109.9 | C(67)-C(68)-C(55) | 100.7 |
| C(69)-C(68)-C(55) | 113.6 | C(70)-C(69)-C(79)   | 120.8 | C(70)-C(69)-C(68) | 128.5 |
| C(79)-C(69)-C(68) | 110.7 | C(69)-C(70)-C(71)   | 119.8 | C(77)-C(71)-C(70) | 118.1 |
| C(77)-C(71)-C(72) | 120.5 | C(70)-C(71)-C(72)   | 121.5 | C(76)-C(72)-C(73) | 116.6 |
| C(76)-C(72)-C(71) | 121.4 | C(73)-C(72)-C(71)   | 122.0 | C(74)-C(73)-C(72) | 119.2 |
| N(7)-C(74)-C(73)  | 124.9 | N(7)-C(75)-C(76)    | 124.6 | C(72)-C(76)-C(75) | 118.7 |
| C(71)-C(77)-C(78) | 121.3 | C(79)-C(78)-C(77)   | 119.5 | C(78)-C(79)-C(69) | 120.4 |
| C(78)-C(79)-C(80) | 131.1 | C(69)-C(79)-C(80)   | 108.4 | C(81)-C(80)-C(90) | 119.2 |
| C(81)-C(80)-C(79) | 131.3 | C(90)-C(80)-C(79)   | 109.5 | C(82)-C(81)-C(80) | 120.4 |
| C(81)-C(82)-C(83) | 120.8 | C(82)-C(83)-C(89)   | 119.9 | C(82)-C(83)-C(84) | 119.5 |
| C(89)-C(83)-C(84) | 120.6 | C(85)-C(84)-C(88)   | 117.3 | C(85)-C(84)-C(83) | 120.1 |
| C(88)-C(84)-C(83) | 122.6 | C(86)-C(85)-C(84)   | 119.5 | N(8)-C(86)-C(85)  | 124.2 |
| N(8)-C(87)-C(88)  | 123.7 | C(87)-C(88)-C(84)   | 118.9 | C(90)-C(89)-C(83) | 118.9 |
| C(89)-C(90)-C(80) | 120.9 | C(89)-C(90)-C(68)   | 129.5 | C(80)-C(90)-C(68) | 109.4 |
| O(7)#6-C(94)-O(4) | 120.1 | O(7)#6-C(94)-O(5)#4 | 126.6 | O(4)-C(94)-O(5)#4 | 113.3 |

Symmetry transformations used to generate equivalent atoms: #1 -x+2,-y+1,-z+1; #2 x,y-1,z+1; #3 -x+2,-y,-z+1; #4 -x+1,-y+1,-z; #5 x,y+1,z-1; #6 -x+2,-y+1,-z

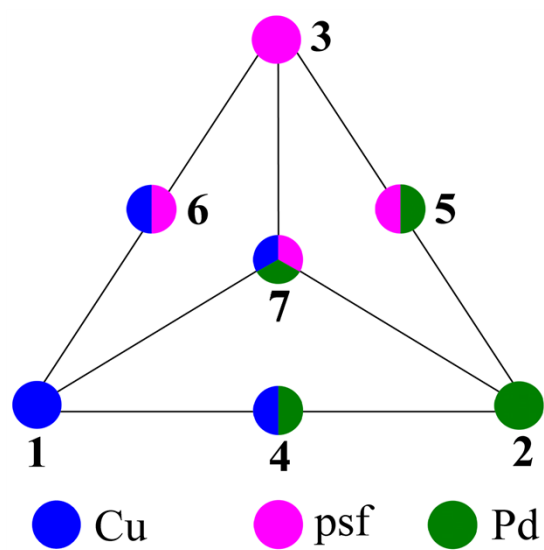

**Fig. S5.** Mixture designs of copper, palladium and psf.

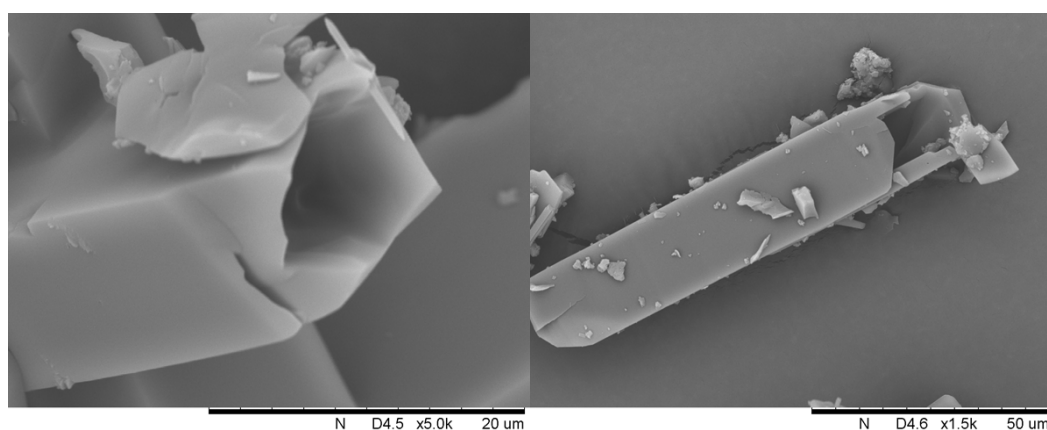

**Fig. S6.** SEM views of the psf ligand.

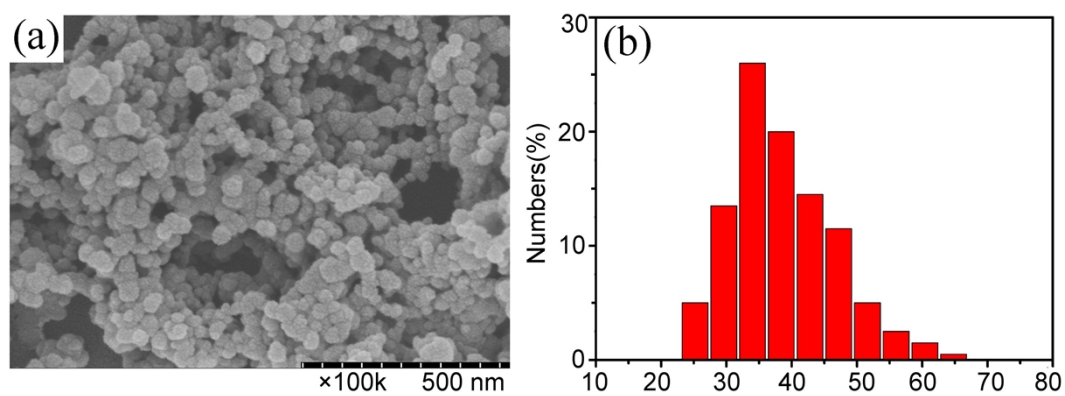

**Fig. S7.** (a) SEM view of Pd/psf NPs separated from in EtOH/H<sub>2</sub>O; (b) Particle size distribution.

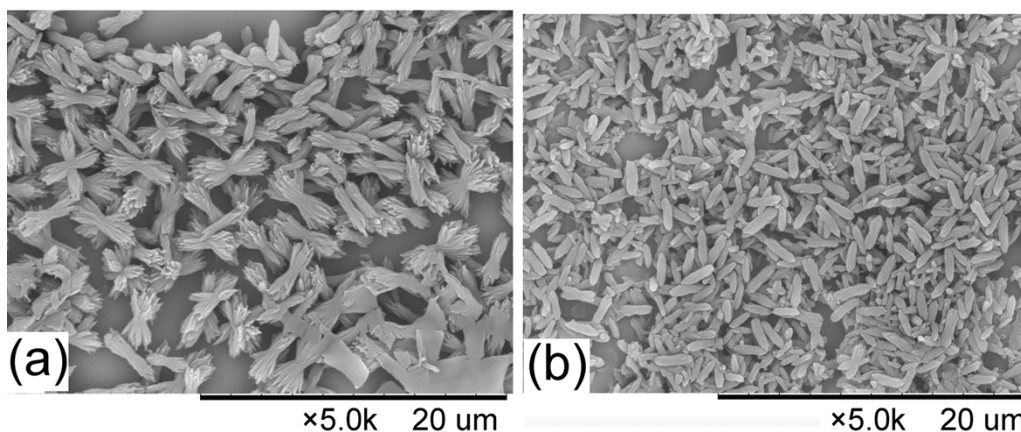

**Fig. S8.** SEM images of (Pd/psf) NPs separated from EtOH/H<sub>2</sub>O at 40°C for 1.0h. (a) for PdCl<sub>2</sub> and psf 1.0 mmol/L; (b) for PdCl<sub>2</sub> and psf 2.5 mmol/L.

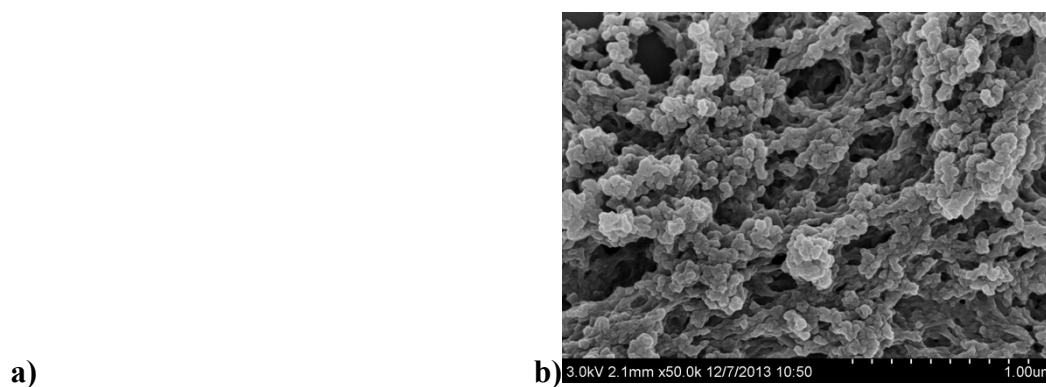

**Fig. S9.** SEM image of (Pd/psf) NPs. (a) separated from DMF/H<sub>2</sub>O at 90 °C for 10h; (b) separated from CH<sub>2</sub>Cl<sub>2</sub>/H<sub>2</sub>O at 90 °C for 10h.

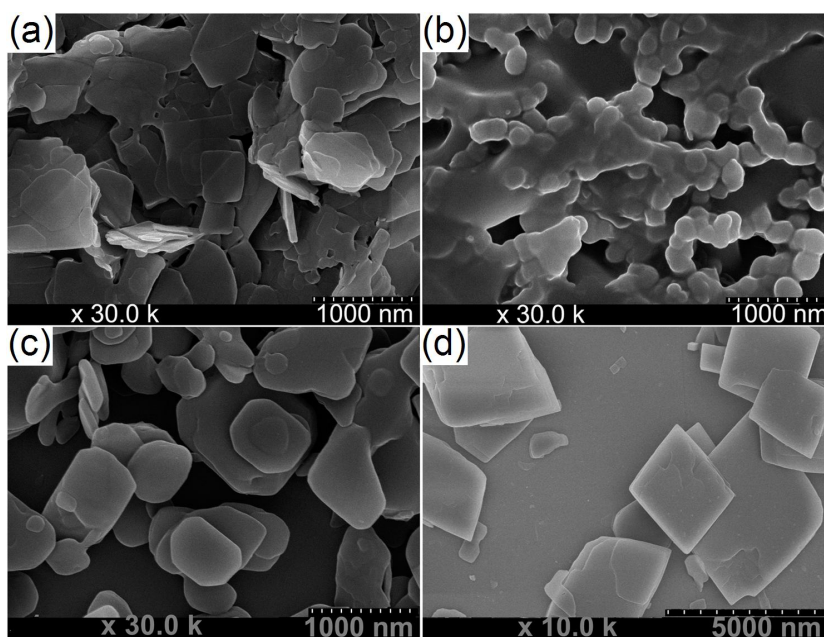

**Fig. S10.** SEM images of the Cu-psf sheets or colloids obtained from different condition. (a) The size 400 x 300 nm<sup>2</sup> form H<sub>2</sub>O-CH<sub>2</sub>Cl<sub>2</sub> at 40 °C for 30min; (b) 200 x

200 nm<sup>2</sup> form H<sub>2</sub>O-EtOH at 40 °C for 30min; (c) 500 x 400 nm<sup>2</sup> form H<sub>2</sub>O-CH<sub>2</sub>Cl<sub>2</sub> at 90 °C for 10h; (d) 2500 x 2500 nm<sup>2</sup> form H<sub>2</sub>O-EtOH at 90 °C for 10h.

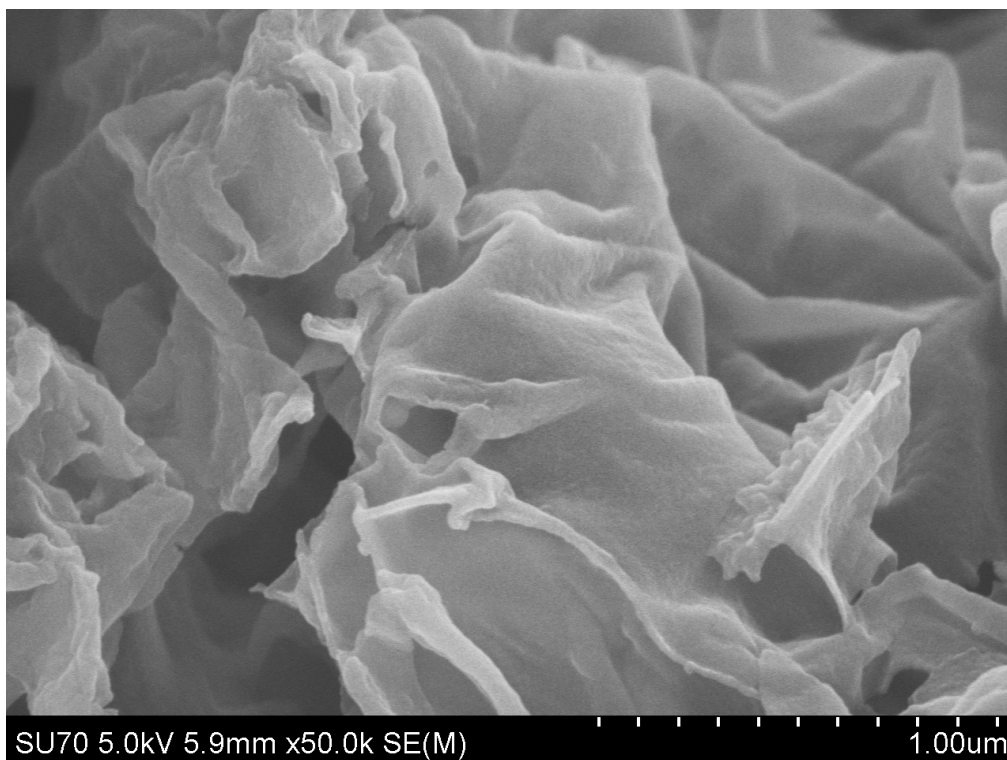

**Fig. S11.** SEM image of (Cu/Pd/psf) composites.

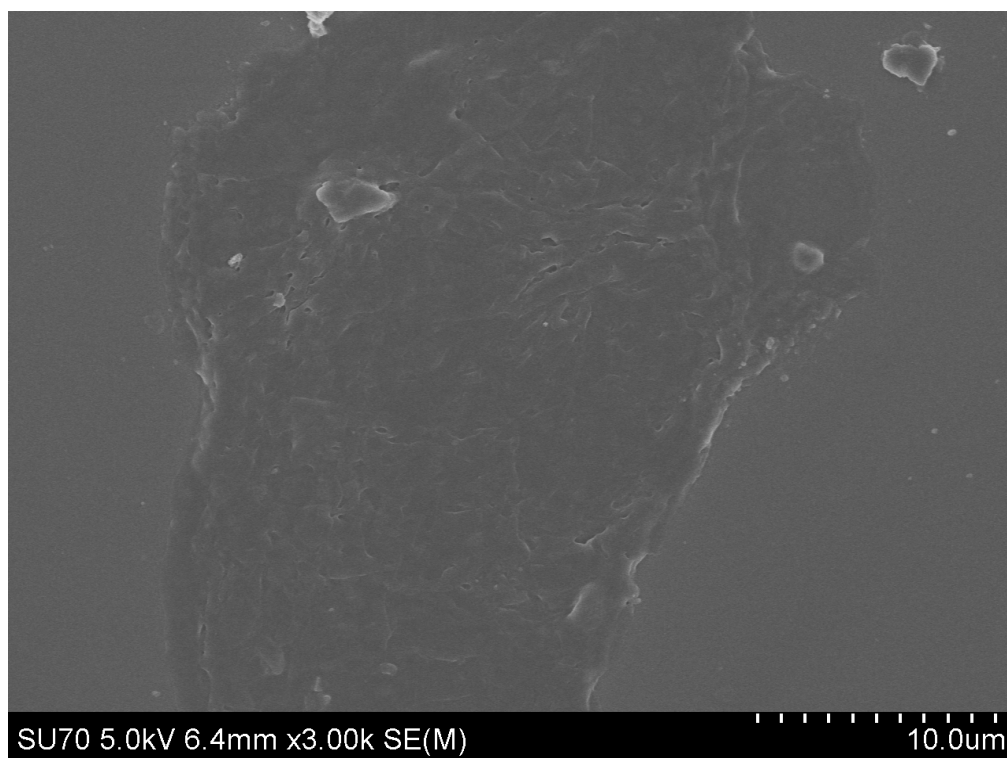

a

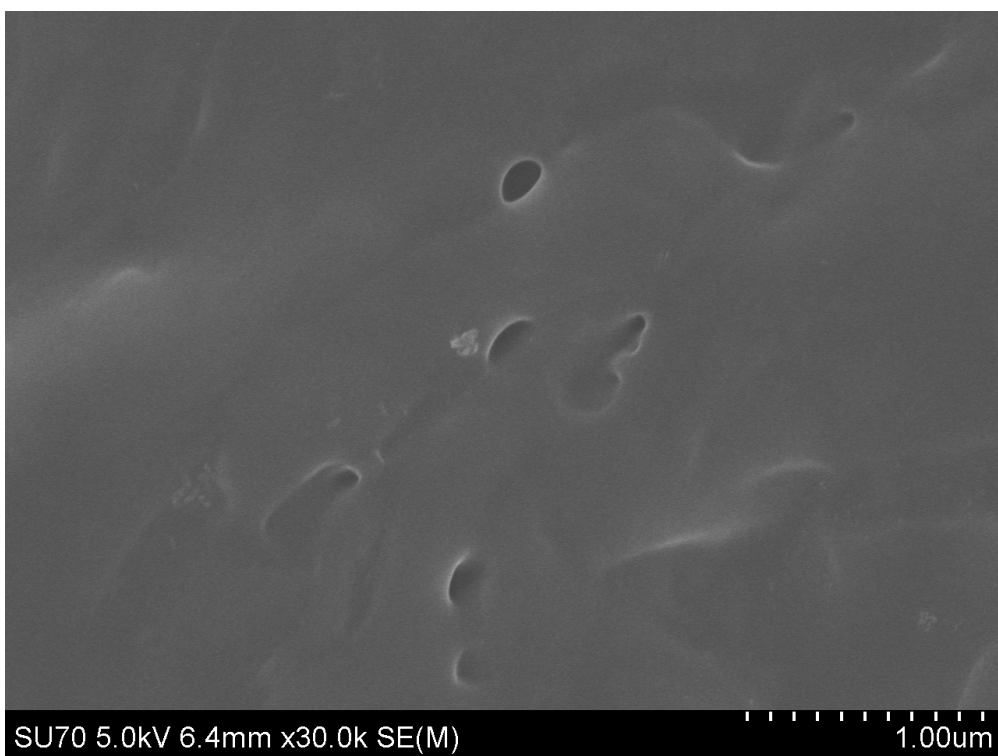

b

Fig. S12. SEM images of the quartz substrate smeared by PEI: a) uneven-distributed, b) well-distributed with PEI.

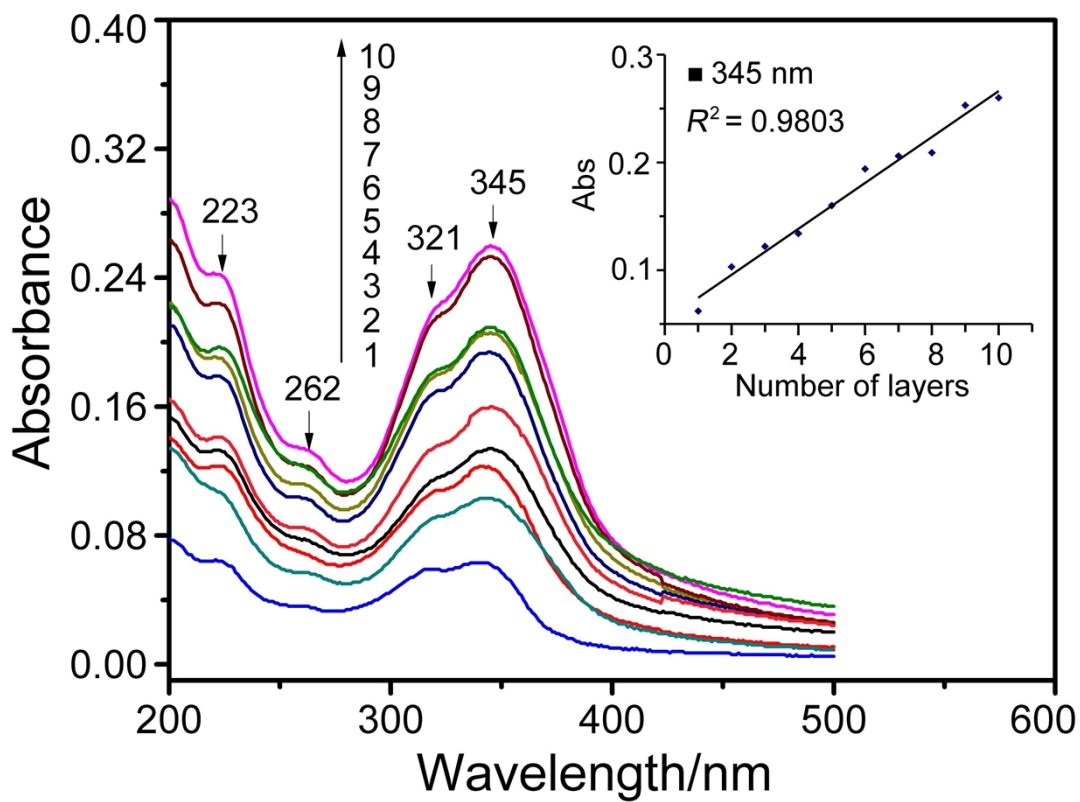

Fig. S13. UV-vis spectra of films PEI-[Cu(NO<sub>3</sub>)<sub>2</sub>/psf]<sub>n</sub> (n = 10).

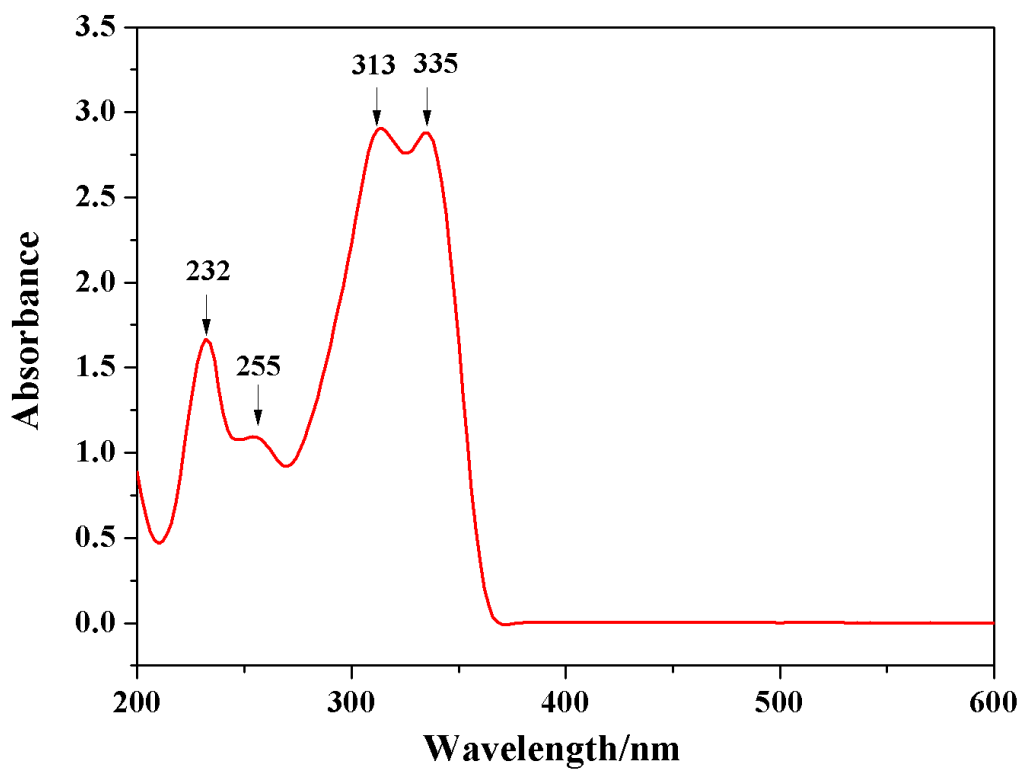

Fig. S14. UV-vis spectra of psf in  $\text{CH}_2\text{Cl}_2$ .

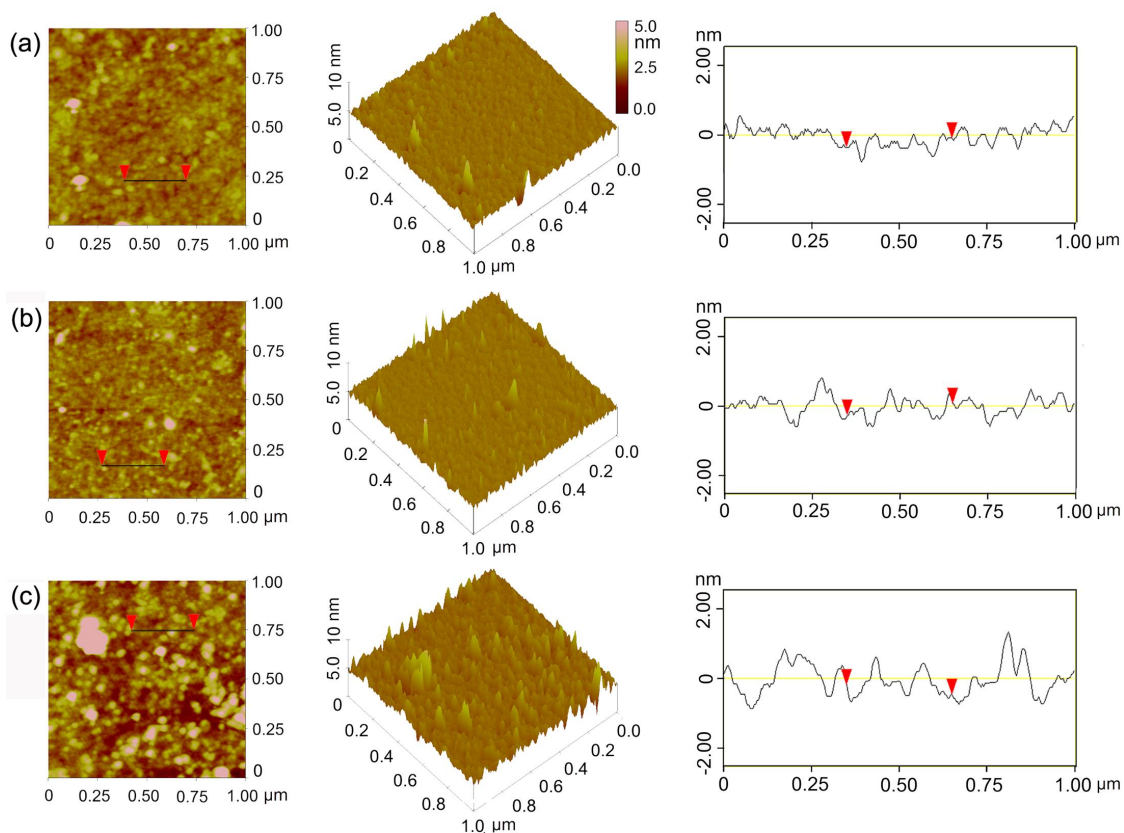

Fig. S15. AFM images of the films. (a)  $(\text{Cu}^{2+}/\text{psf})_5$  ( $R_{\text{rms}} = 0.430$  nm,  $R_{\text{max}} = 6.615$  nm). (b)  $(\text{Cu}^{2+}/\text{psf})_{10}$  ( $R_{\text{rms}} = 1.134$  nm,  $R_{\text{max}} = 16.325$  nm). (c)  $(\text{Cu}^{2+}/\text{psf})_{15}$  ( $R_{\text{rms}} = 1.293$  nm,  $R_{\text{max}} = 25.461$  nm).

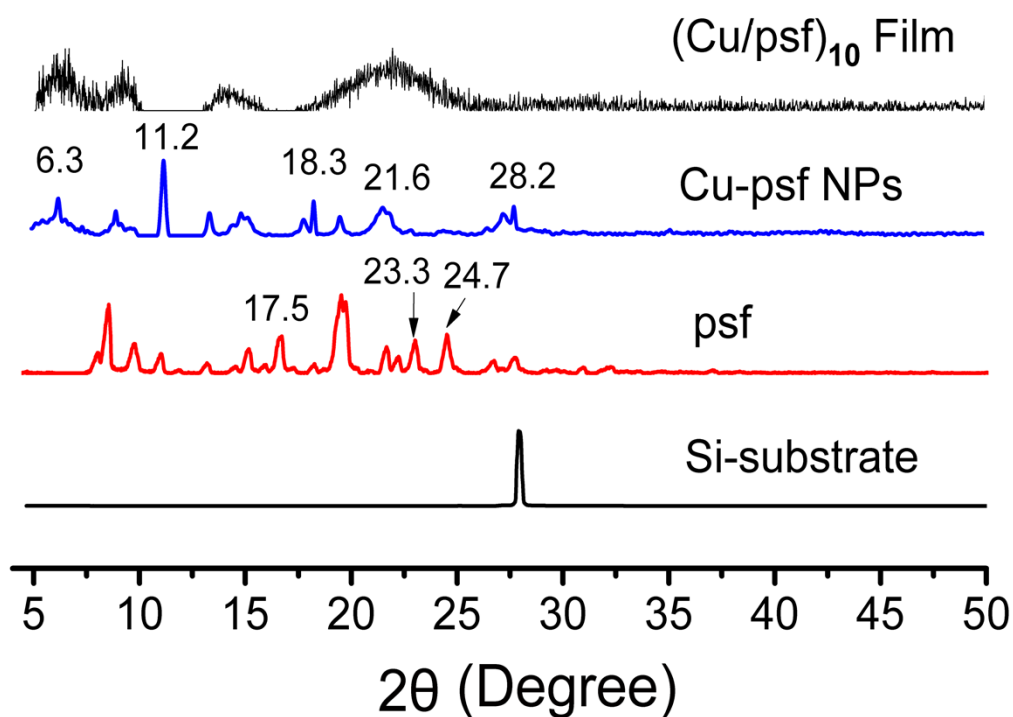

**Fig. S16.** PXRD patterns. CuO peaks: 16.6, 23.8.; Cu(OH)<sub>2</sub> peak: 6.9

**Table S3.** Screening of Cu-catalysts for the coupling reactions of aryl iodides with aryl boronic acids.

| Entry | Catalyst                                      | T/°C | Time/h | Yield/% |
|-------|-----------------------------------------------|------|--------|---------|
| 1     | Cu powder                                     | 90   | 10     | Trace   |
| 2     | Cu powder + psf                               | 90   | 10     | 47      |
| 3     | CuI                                           | 90   | 10     | Trace   |
| 4     | CuI + psf                                     | 90   | 10     | 99      |
| 5     | Cu(NO <sub>3</sub> ) <sub>2</sub>             | 90   | 10     | 0       |
| 6     | Cu(NO <sub>3</sub> ) <sub>2</sub> /psf sheets | 90   | 10     | 95      |
| 7     | CuSO <sub>4</sub>                             | 90   | 10     | 0       |
| 8     | CuSO <sub>4</sub> /psf                        | 90   | 10     | 34      |
| 9     | CuCl <sub>2</sub>                             | 90   | 10     | 0       |
| 10    | CuCl <sub>2</sub> /psf                        | 90   | 10     | 26      |

Typical procedure: 1.0 mmol of aryl iodide, 1.2 mmol of aryl boronic acid, 3.0 mmol of K<sub>2</sub>CO<sub>3</sub>, 0.03 mmol of catalysts (3.0% metal or metal-ligand nanoparticles relative to aryl iodide), 4.0 mL of EtOH and 3.0 mL of H<sub>2</sub>O.

**Table S4.** Effect of nanoparticulate dimensional sizes of Cu-psf combination on the yields in the coupling reactions.

| Entry | Catalyst      | Size                                  | T/°C | Time/h | Yield/% |
|-------|---------------|---------------------------------------|------|--------|---------|
| 1     | Cu-psf sheets | 200 x 200 nm <sup>2</sup> (Fig. 5b)   | 90   | 10     | 83 ± 3  |
| 2     | Cu-psf sheets | 400 x 300 nm <sup>2</sup> (Fig. 5a)   | 90   | 10     | 71 ± 3  |
| 3     | Cu-psf sheets | 500 x 400 nm <sup>2</sup> (Fig. 5c)   | 90   | 10     | 65 ± 3  |
| 4     | Cu-psf sheets | 2500 x 2500 nm <sup>2</sup> (Fig. 5d) | 90   | 10     | 58 ± 5  |

Aryl iodide (1.0 mmol), arylboronic acid (1.2 mmol), K<sub>2</sub>CO<sub>3</sub> (3.0 mmol) in H<sub>2</sub>O / EtOH at 90°C for 10h. Catalyst-loading 3.0%.

**Table S5.** Effect of amount of catalysts on the coupling reaction of aryl iodides with aryl boronic acids using [Cu(NO<sub>3</sub>)<sub>2</sub>/psf] nanoparticulates as catalysts.

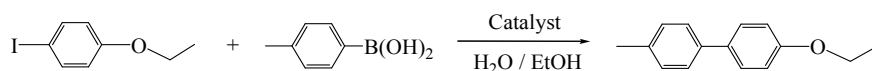

| Entry | Cu-loading (mmol %)    | T (°C) | Time (h) | Yield (%) |
|-------|------------------------|--------|----------|-----------|
| 1     | 2.9                    | 90     | 10       | 95        |
| 2     | 2.9 × 10 <sup>-1</sup> | 90     | 10       | 90        |
| 3     | 2.9 × 10 <sup>-2</sup> | 90     | 10       | 89        |
| 4     | 2.9 × 10 <sup>-3</sup> | 90     | 10       | <5        |
| 5     | 2.9 × 10 <sup>-4</sup> | 90     | 10       | <3        |

General procedure: Aryl iodide (1.0 mmol), arylboronic acid (1.2 mmol), K<sub>2</sub>CO<sub>3</sub> (3.0 mmol) in H<sub>2</sub>O / EtOH at 90°C for 10h. Cu(II) : psf = 1:1 (mol/mol).

**Table S6.** Effect of the co-catalysts and temperatures on the coupling reactions of aryl iodides with aryl boronic acids under ambient atmosphere for 10 hours.

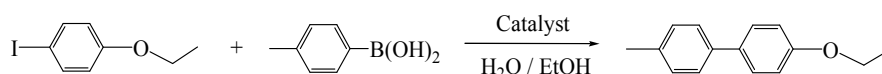

| Entry | Catalyst                                                    | T / °C    | Yield (%)    |
|-------|-------------------------------------------------------------|-----------|--------------|
| 1     | Cu(NO <sub>3</sub> ) <sub>2</sub> /PPh <sub>3</sub> NPs     | 90        | 0            |
| 2     | Cu(NO <sub>3</sub> ) <sub>2</sub> /bpy NPs                  | 50/70 /90 | 0 / 4 / 31   |
| 3     | Cu(NO <sub>3</sub> ) <sub>2</sub> /psf sheets               | 50/70 /90 | 5 / 87 / 95  |
| 4     | (Cu(NO <sub>3</sub> ) <sub>2</sub> /psf) <sub>10</sub> film | 50/70 /90 | 12 / 90 / 99 |

Procedure: aryl iodide (1.0 mmol), arylboronic acid (1.2 mmol), K<sub>2</sub>CO<sub>3</sub> (3.0 mmol), in H<sub>2</sub>O / EtOH (4:3, V/V). bpy = 4,4'-bipyridine. Catalyst-loading 3.0% for Cu(NO<sub>3</sub>)<sub>2</sub>/PPh<sub>3</sub> NPs, Cu(NO<sub>3</sub>)<sub>2</sub>/bpy NPs and Cu(NO<sub>3</sub>)<sub>2</sub>/psf sheets; 1.4 × 10<sup>-5</sup> mol% (Cu(NO<sub>3</sub>)<sub>2</sub>/psf)<sub>10</sub> film.



## IR and NMR of the coupling products

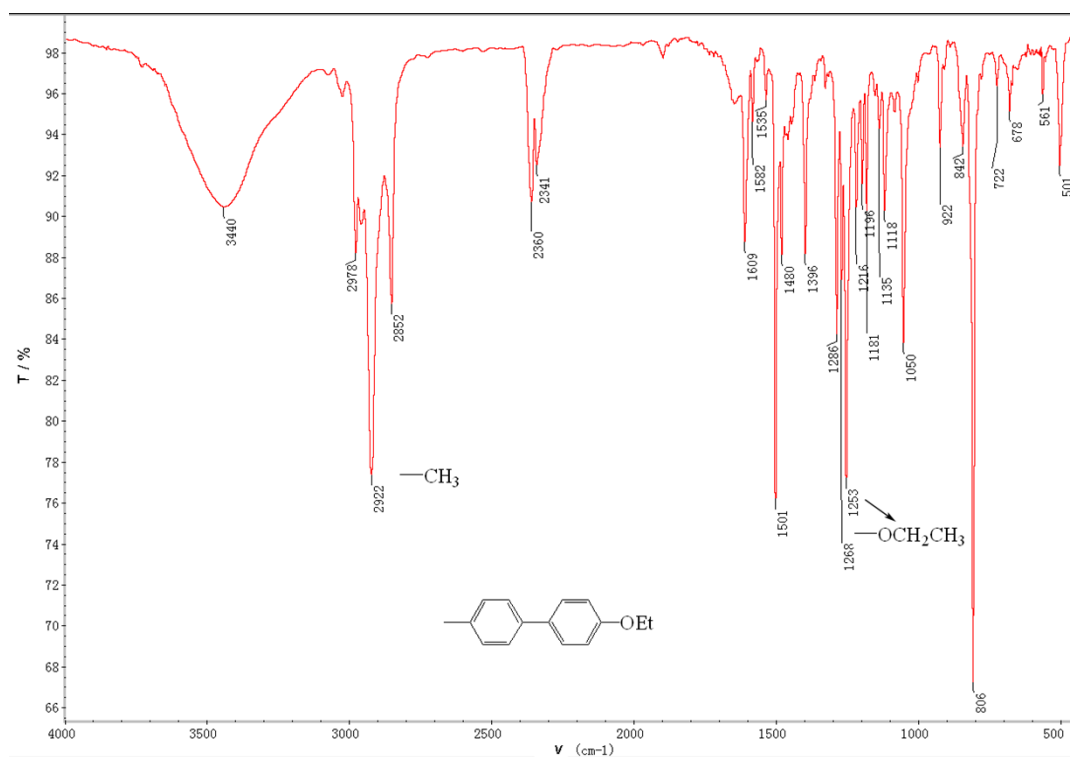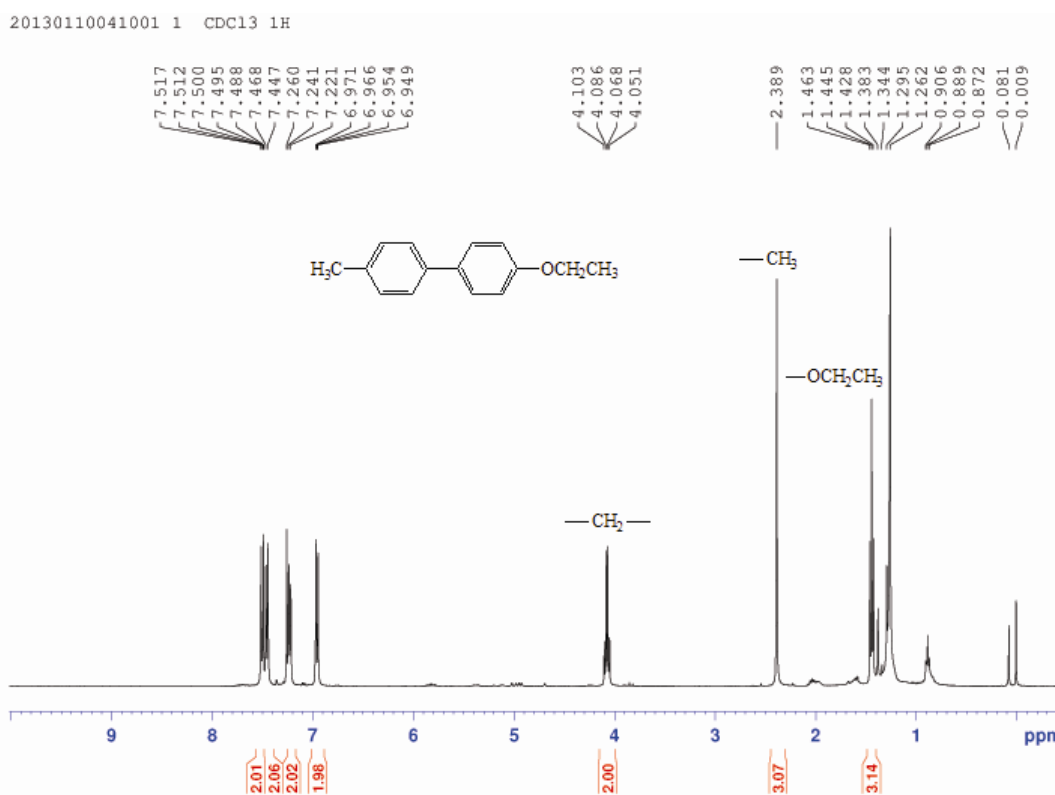

<sup>1</sup>H NMR (CDCl<sub>3</sub>, 400 MHz):  $\delta$  = 7.517-7.512 (d, 2H, -C<sub>6</sub>H<sub>4</sub>), 7.500-7.495 (d, 2H, -C<sub>6</sub>H<sub>4</sub>), 7.260-7.241 (d, 2H, -C<sub>6</sub>H<sub>4</sub>), 6.966-6.954 (d, 2H, -C<sub>6</sub>H<sub>4</sub>), 4.103-4.051 (q, 2H, -CH<sub>2</sub>), 2.389 (s, 3H, -CH<sub>3</sub>), 1.463-1.428 (t, 3H, -CH<sub>3</sub>) ppm.

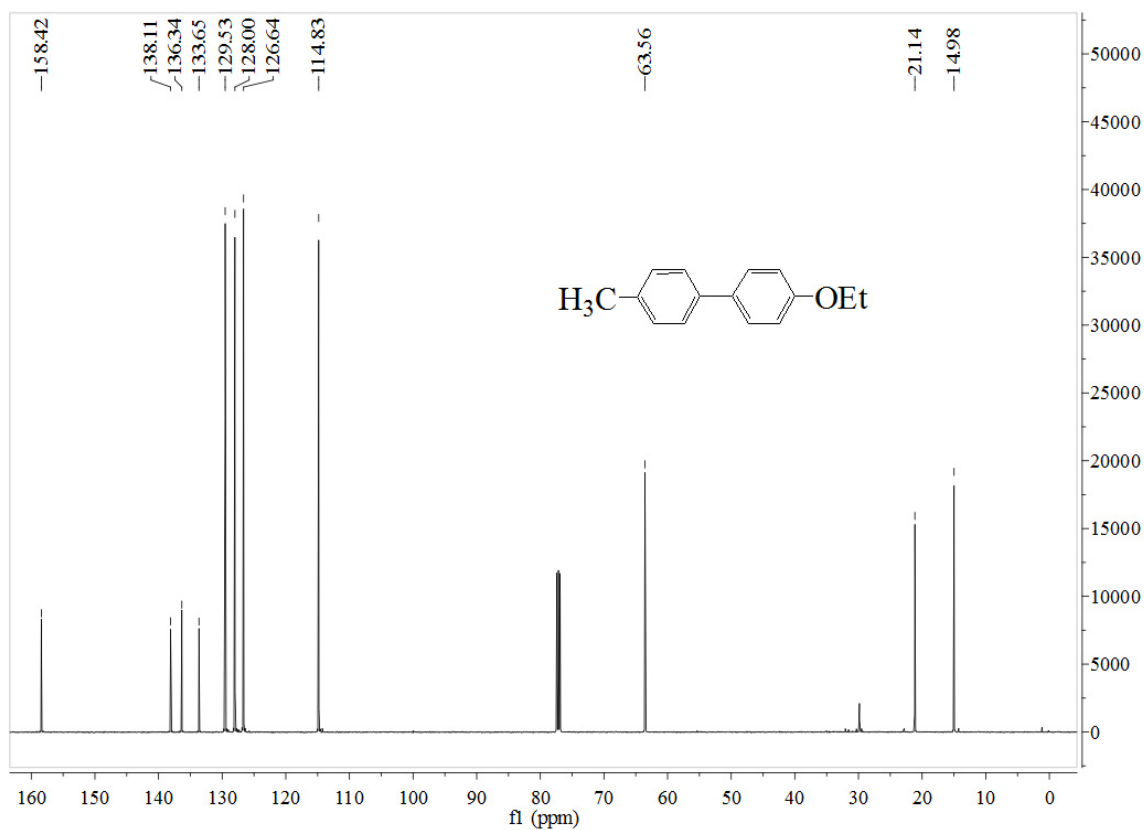

<sup>13</sup>C NMR (CDCl<sub>3</sub>, 125 MHz):  $\delta$  = 158.42 (C-O), 138.11 (C), 136.34 (C), 133.65 (CH), 129.53 (CH), 128.00 (C), 126.64 (CH), 114.83 (CH), 63.56 (CH<sub>2</sub>), 21.14 (CH<sub>3</sub>), 14.98 (CH<sub>3</sub>) ppm.

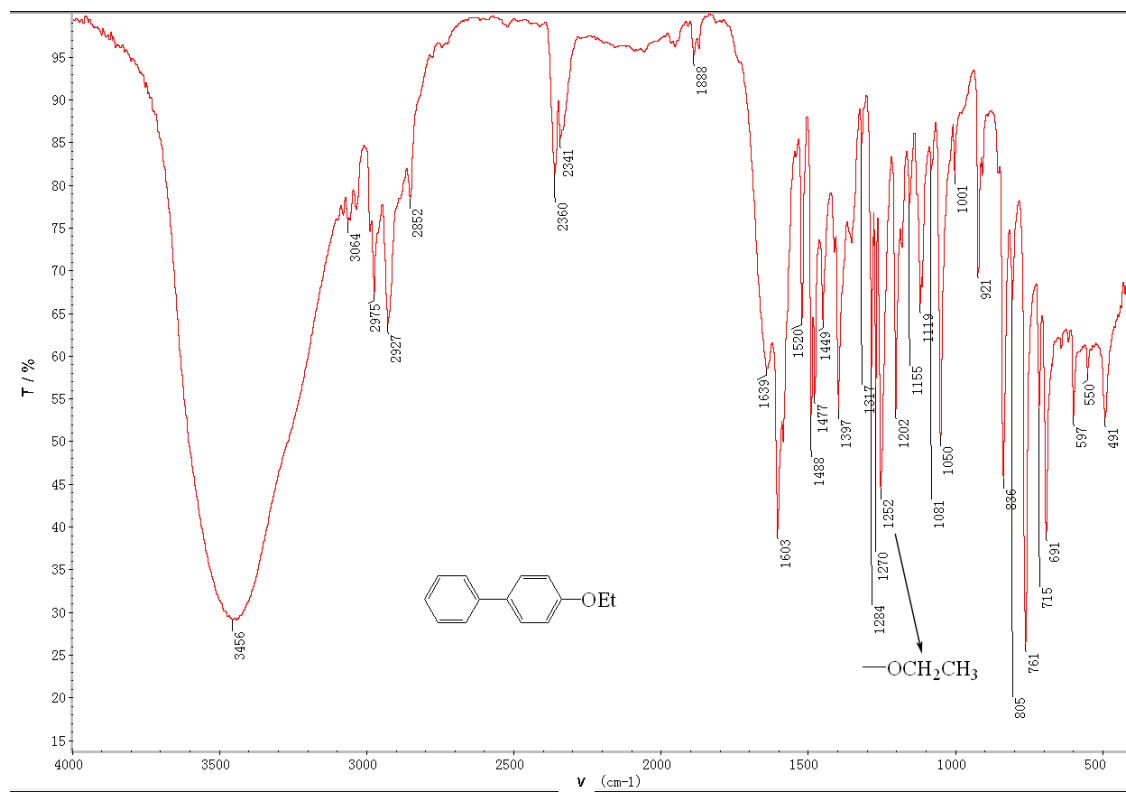

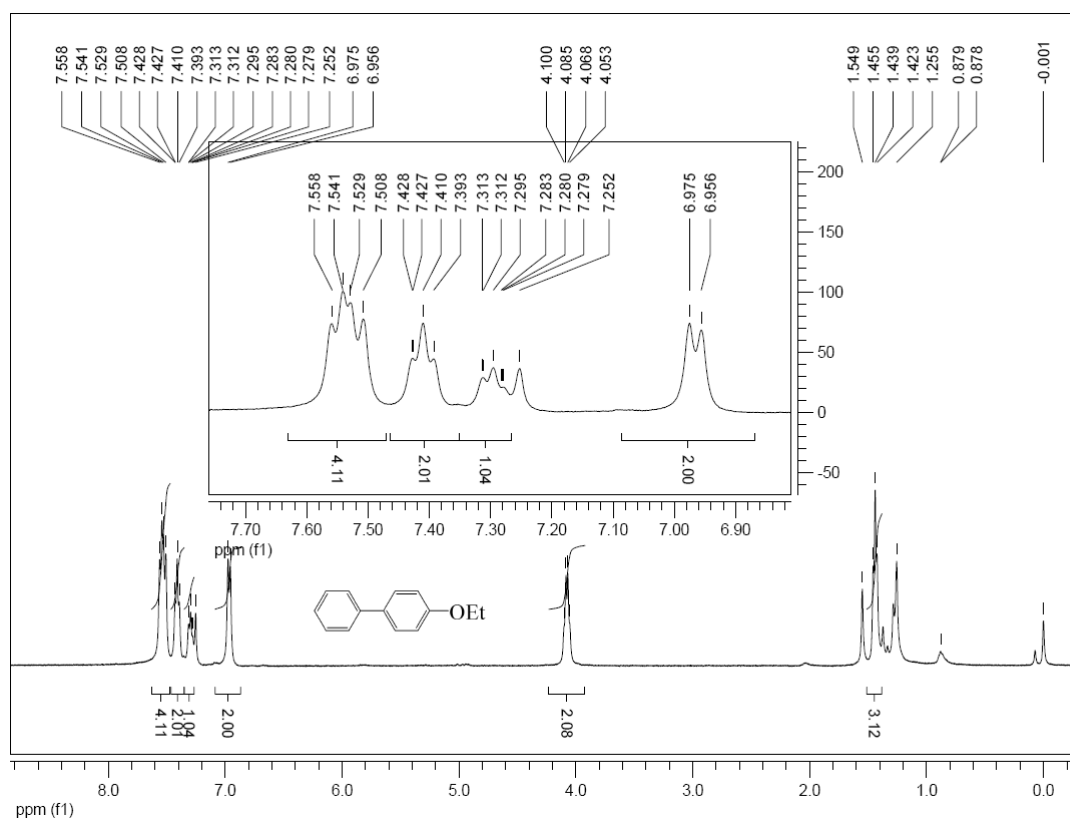

<sup>1</sup>H NMR (CDCl<sub>3</sub>, 400 MHz):  $\delta$  = 7.558-7.508 (m, 4H, -C<sub>6</sub>H<sub>5</sub>, -C<sub>6</sub>H<sub>4</sub>), 7.427-7.393 (t, 2H, -C<sub>6</sub>H<sub>5</sub>), 7.312-7.283 (t, 1H, -C<sub>6</sub>H<sub>5</sub>), 6.975-6.956 (d, 2H, -C<sub>6</sub>H<sub>2</sub>), 4.100-4.053 (q, 2H, -CH<sub>2</sub>), 1.455-1.423 (t, 3H, -CH<sub>3</sub>) ppm.

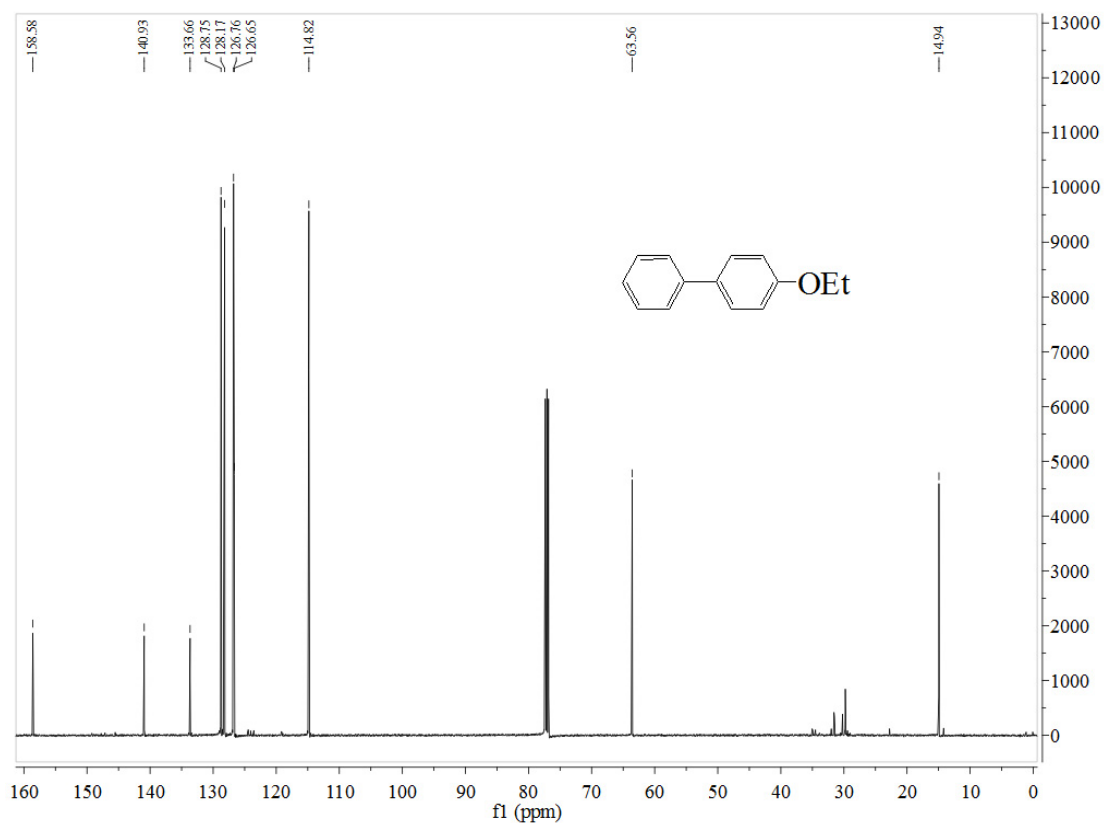

<sup>13</sup>C NMR (CDCl<sub>3</sub>, 125 MHz):  $\delta$  = 158.58 (C-O), 140.93 (C), 133.66 (CH), 128.75 (CH), 128.17 (C), 126.76 (CH), 126.65 (CH), 114.82 (CH), 63.56 (CH<sub>2</sub>), 14.94 (CH<sub>3</sub>) ppm.

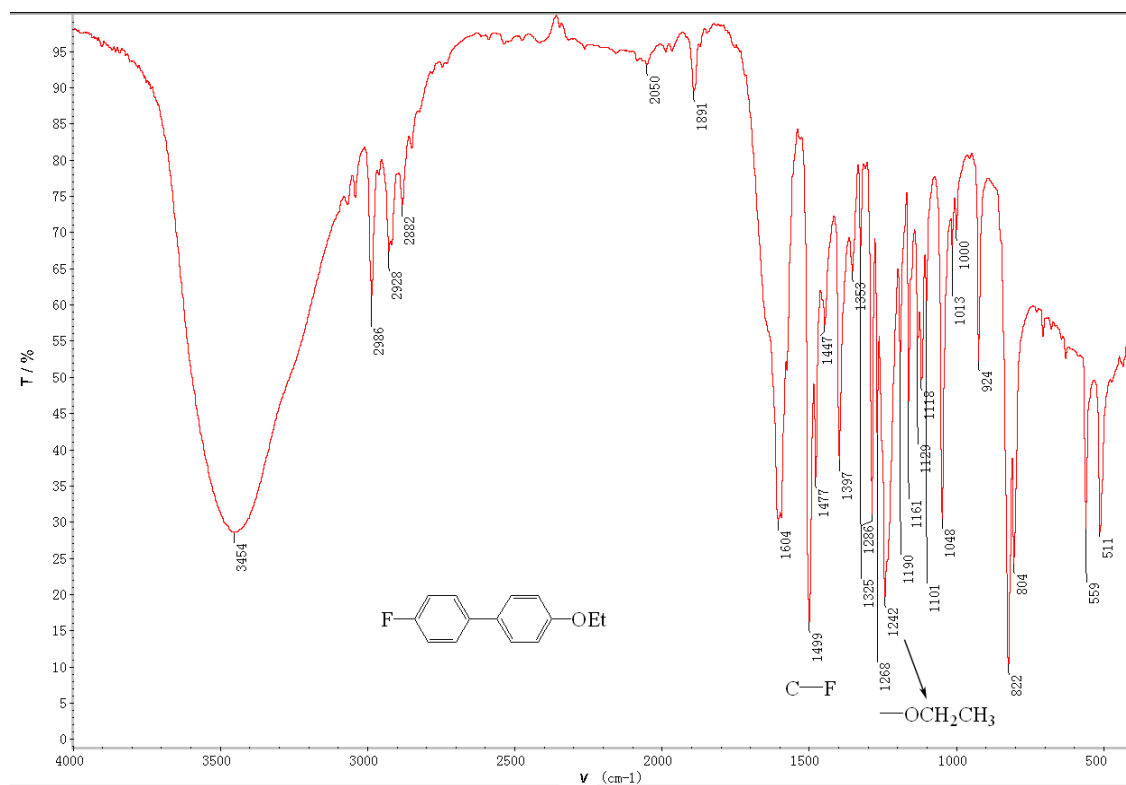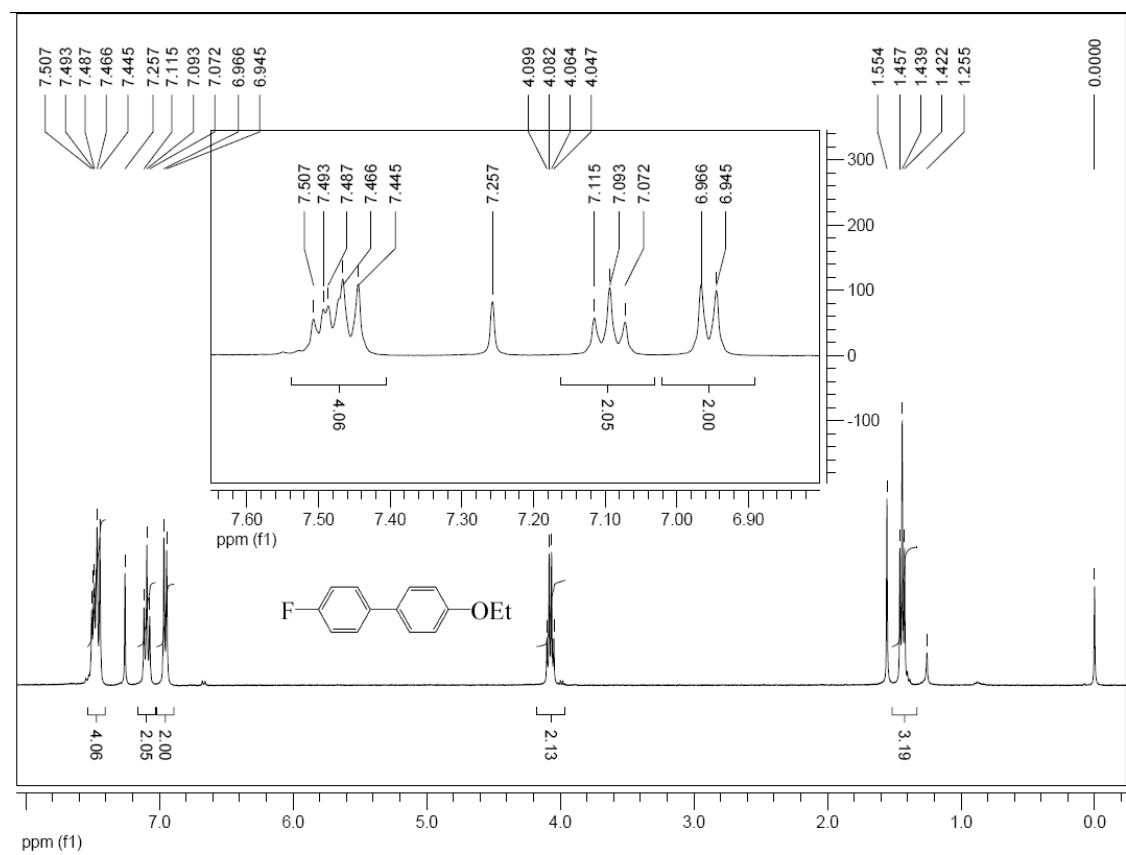

<sup>1</sup>H NMR (CDCl<sub>3</sub>, 400 MHz):  $\delta$  = 7.507-7.445 (m, 4H, -C<sub>6</sub>H<sub>4</sub>, -C<sub>6</sub>H<sub>4</sub>F), 7.115-7.072 (t, 2H, -C<sub>6</sub>H<sub>4</sub>F), 6.966-6.945 (d, 2H, -C<sub>6</sub>H<sub>4</sub>), 4.099 ~ 4.047 (q, 2H, -CH<sub>2</sub>), 1.457-1.422 (t, 3H, -CH<sub>3</sub>) ppm.

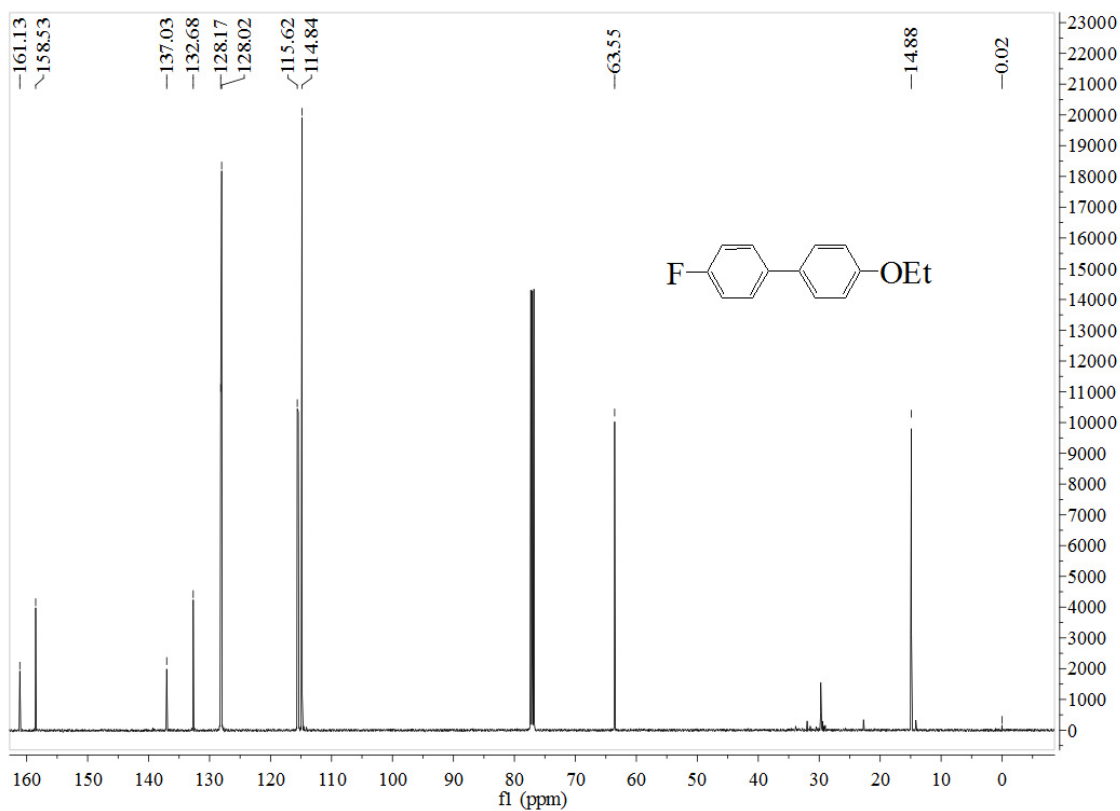

<sup>13</sup>C NMR (CDCl<sub>3</sub>, 125 MHz):  $\delta$  = 161.13 (C-F), 158.53 (C-O), 137.03 (C), 132.68 (CH), 128.17 (CH), 128.02 (C), 115.62 (CH), 114.84 (CH), 63.55 (CH<sub>2</sub>), 14.88 (CH<sub>3</sub>) ppm.

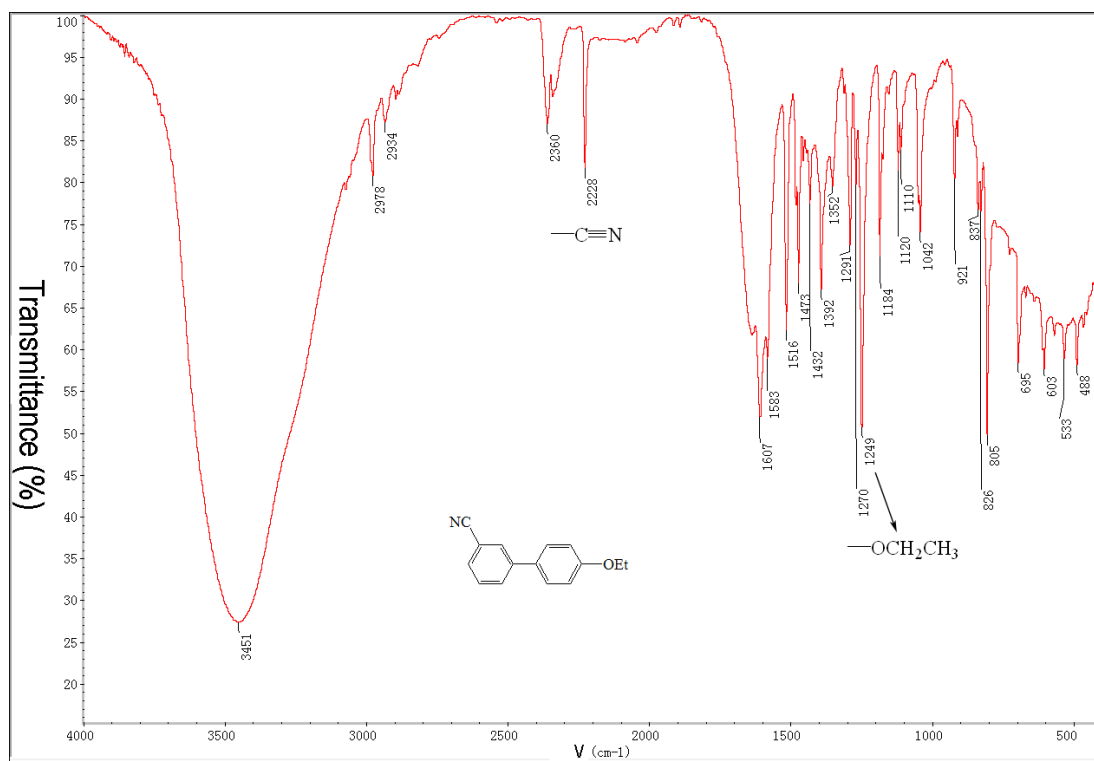

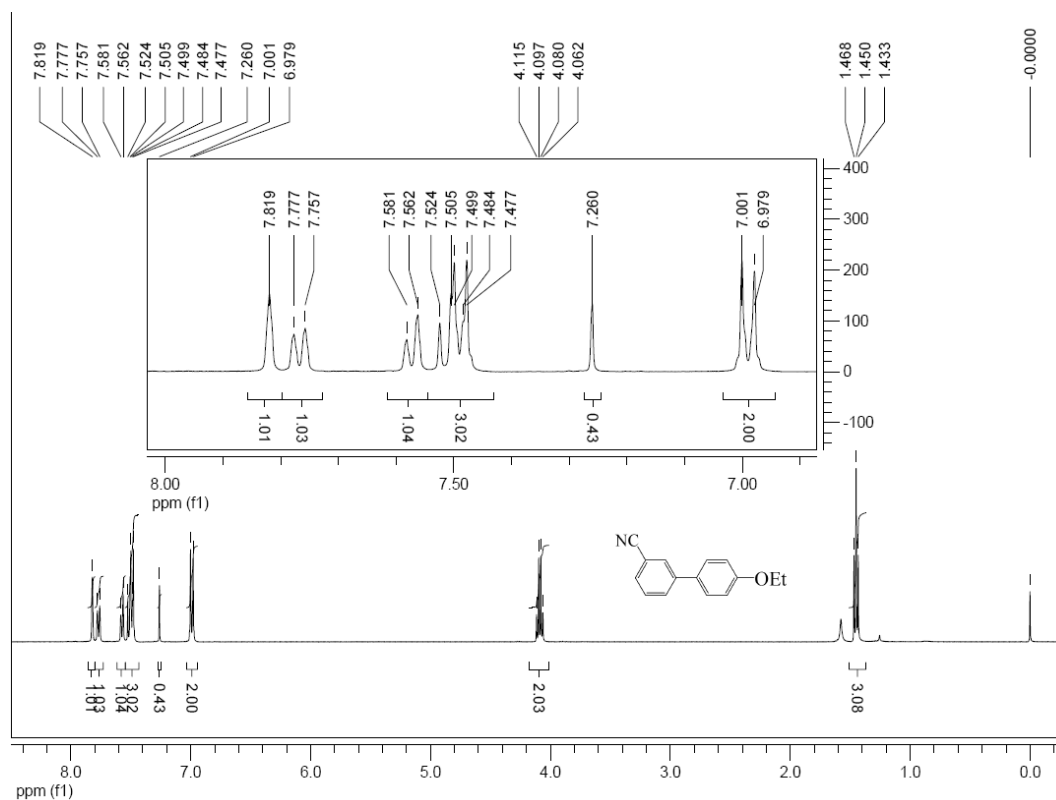

<sup>1</sup>H NMR (CDCl<sub>3</sub>, 400 MHz): δ = 7.819 (s, 1H, -C<sub>6</sub>H<sub>4</sub>CN), 7.777-7.757 (d, 1H, -C<sub>6</sub>H<sub>4</sub>CN), 7.581-7.477 (m, 4H, -C<sub>6</sub>H<sub>4</sub>), 7.001-6.979 (d, 2H, -C<sub>6</sub>H<sub>4</sub>), 4.115-4.062 (q, 2H, -CH<sub>2</sub>), 1.46-1.433 (t, 3H, -CH<sub>3</sub>) ppm.

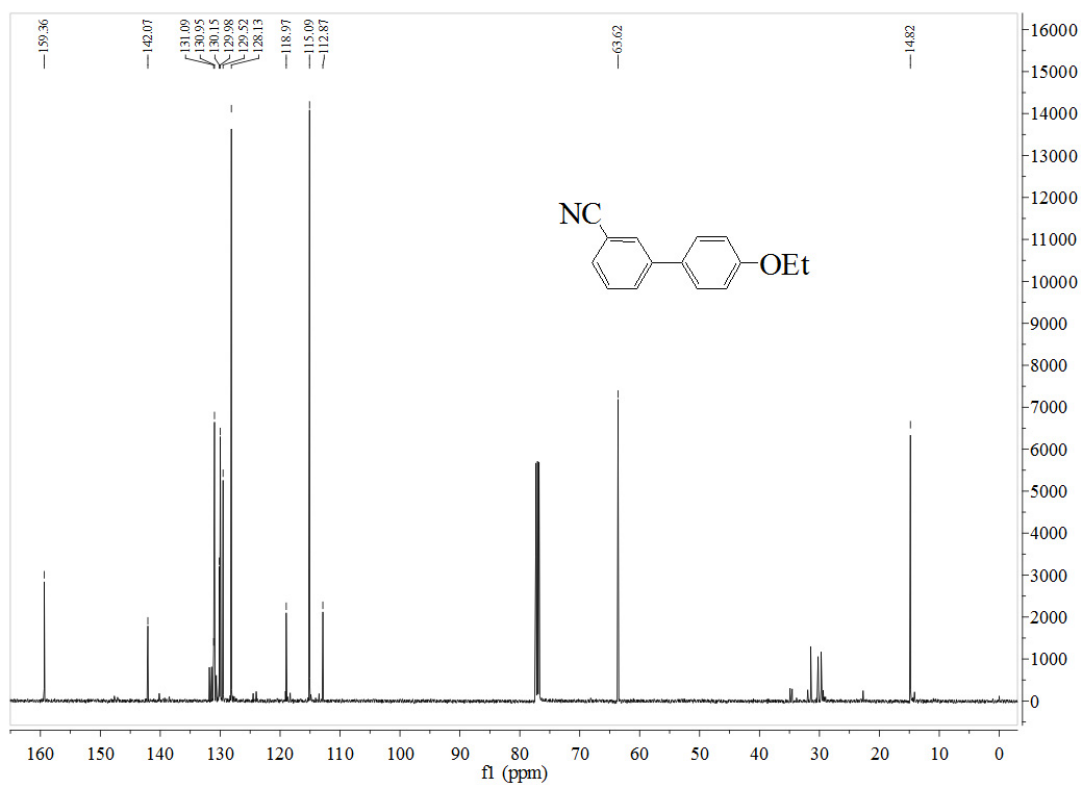

<sup>13</sup>C NMR (CDCl<sub>3</sub>, 125 MHz): δ = 159.36 (C-O), 142.07 (C), 131.09 (CH), 130.95 (CH), 130.15 (CH), 129.98 (CH), 129.52 (CH), 128.13 (C), 118.97 (CN), 115.09 (CH), 112.87 (C), 63.57 (CH<sub>2</sub>), 14.78 (CH<sub>3</sub>) ppm.

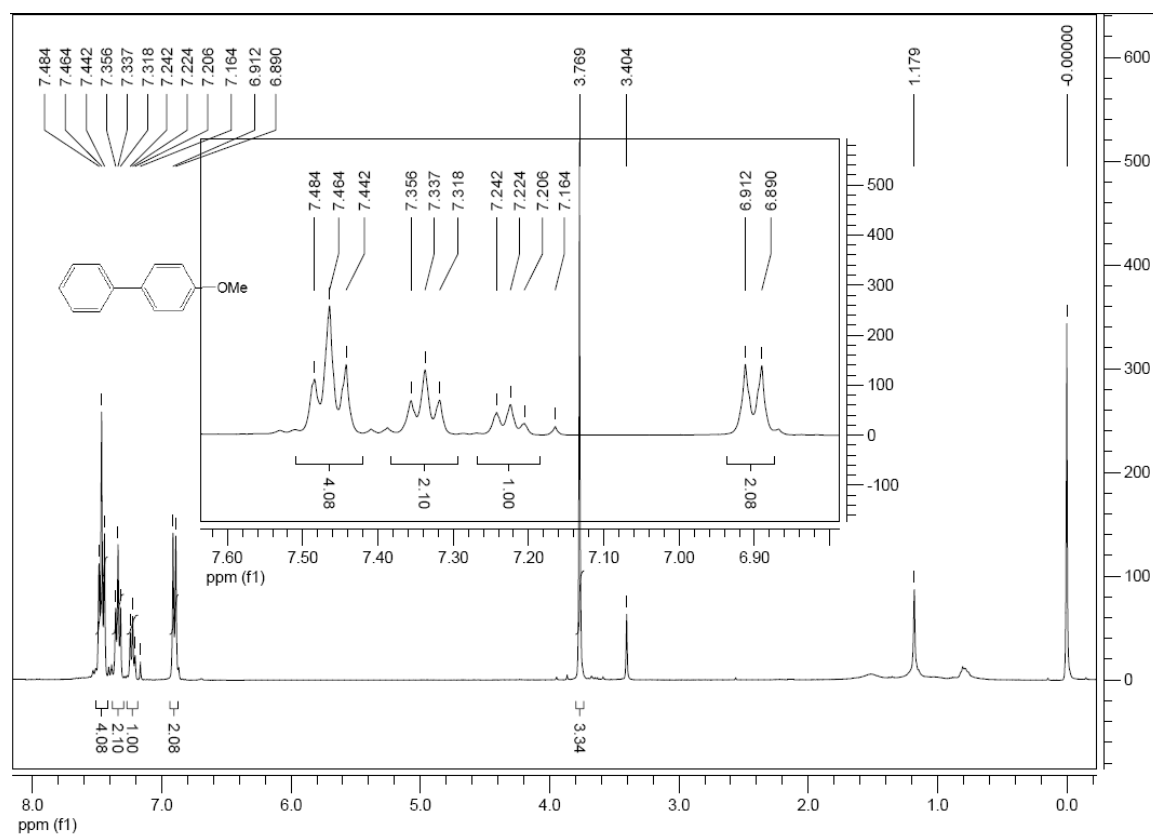

<sup>1</sup>H NMR (CDCl<sub>3</sub>, 400 MHz):  $\delta$  = 7.484-7.442 (m, 4H, -C<sub>6</sub>H<sub>4</sub>, -C<sub>6</sub>H<sub>5</sub>), 7.356-7.318 (t, 2H, -C<sub>6</sub>H<sub>5</sub>), 7.242-7.206 (t, 1H, -C<sub>6</sub>H<sub>5</sub>), 6.912-6.890 (d, 2H, -C<sub>6</sub>H<sub>4</sub>), 3.769 (s, 3H, -CH<sub>3</sub>) ppm.

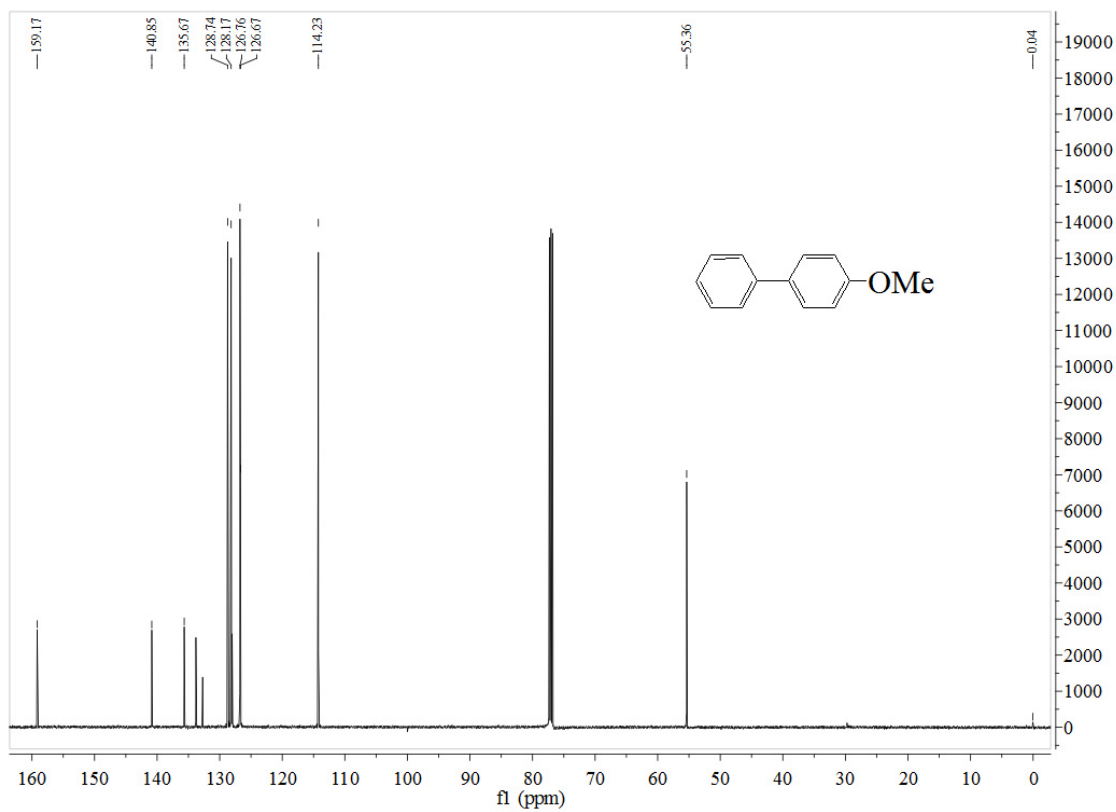

$^{13}\text{C}$  NMR ( $\text{CDCl}_3$ , 125 MHz):  $\delta = 159.17$  (C-O), 140.85 (C), 135.67 (CH), 128.74 (CH), 128.17 (C), 126.76 (CH), 126.67 (CH), 114.23 (CH), 55.36 ( $\text{CH}_3$ ) ppm.



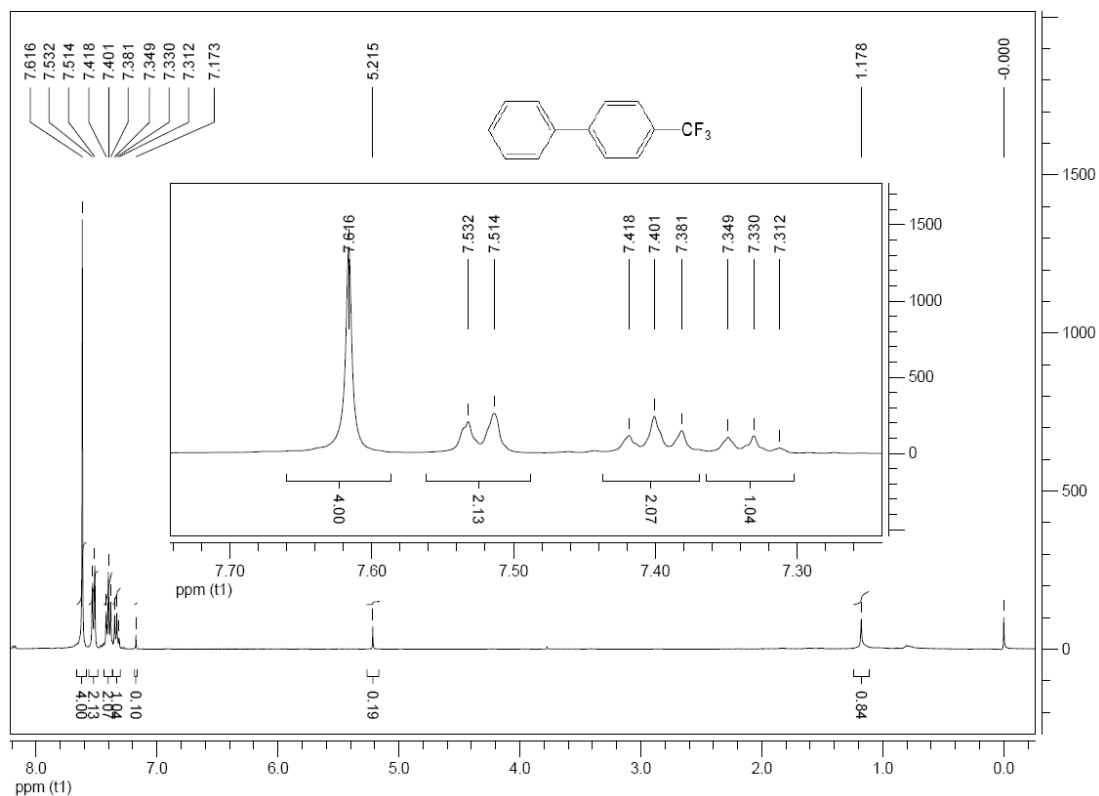

<sup>1</sup>H NMR (CDCl<sub>3</sub>, 400 MHz): δ = 7.616 (s, 4H, -C<sub>6</sub>H<sub>4</sub>, -C<sub>6</sub>H<sub>5</sub>), 7.532-7.514 (d, 2H, -C<sub>6</sub>H<sub>4</sub>), 7.418-7.381 (t, 2H, -C<sub>6</sub>H<sub>5</sub>), 7.349-7.312 (t, 1H, -C<sub>6</sub>H<sub>5</sub>) ppm.

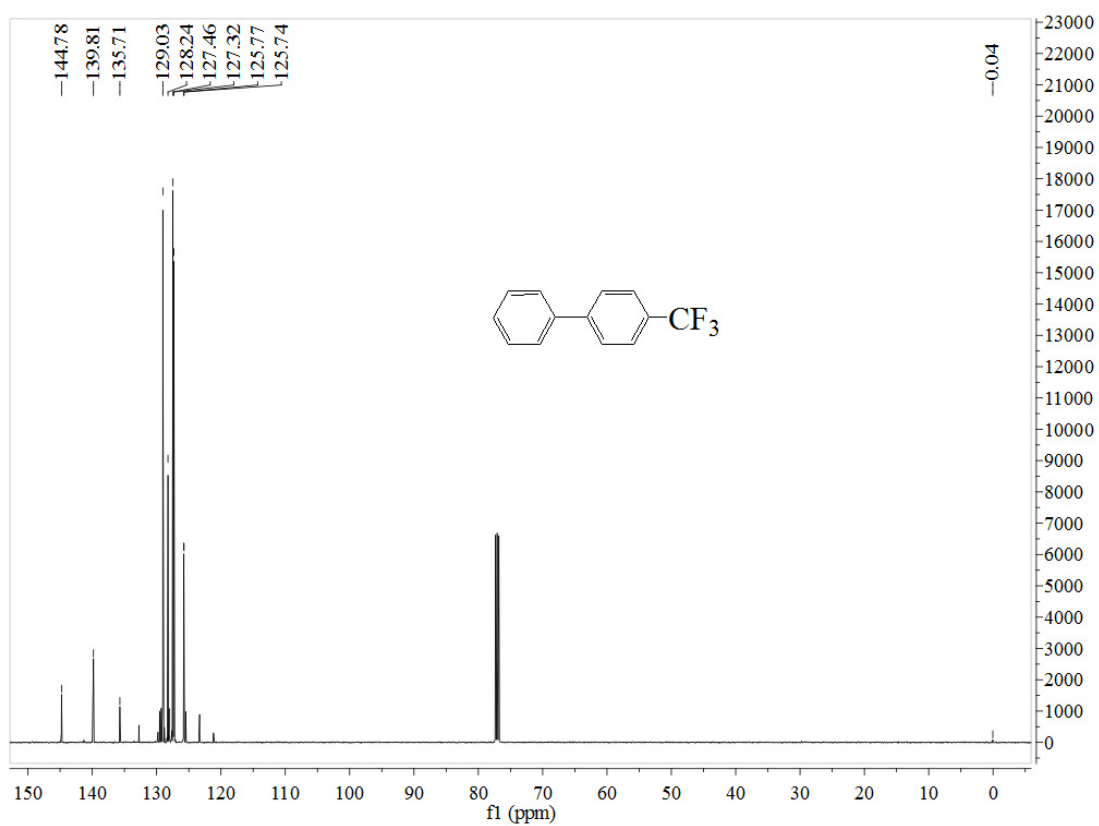

<sup>13</sup>C NMR (CDCl<sub>3</sub>, 125 MHz): δ = 144.78 (C), 139.81 (C), 135.71 (C), 129.03 (CH), 128.24 (CH), 127.46 (CH), 127.32 (CH), 125.77 (CH), 125.74 (CF<sub>3</sub>) ppm.

## GC-MS of the coupling products

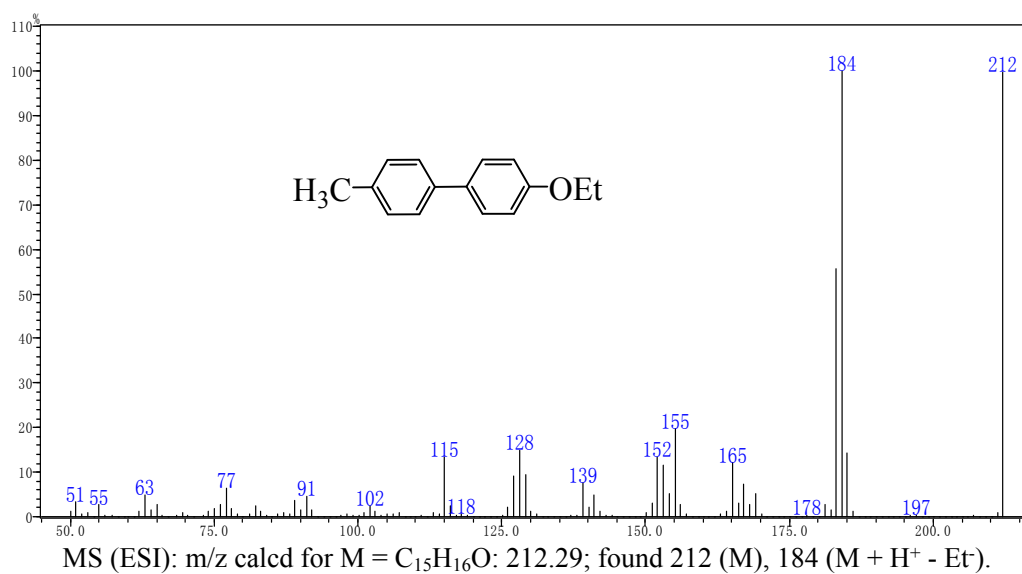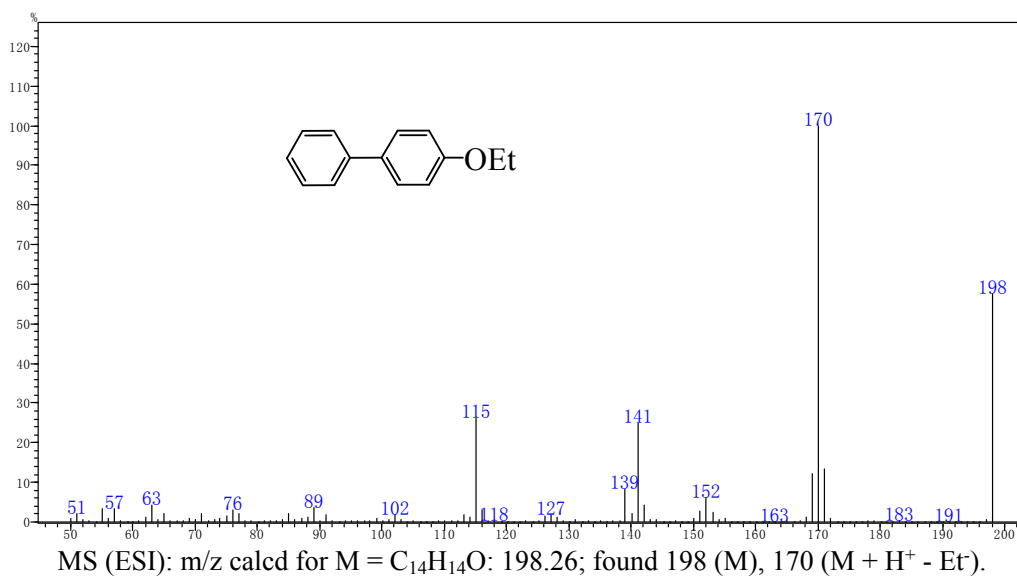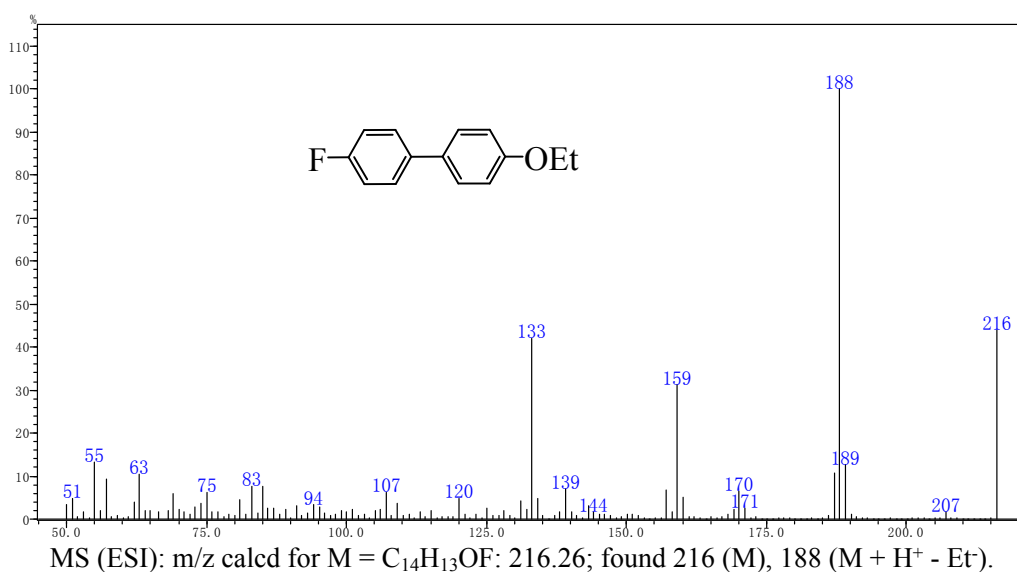

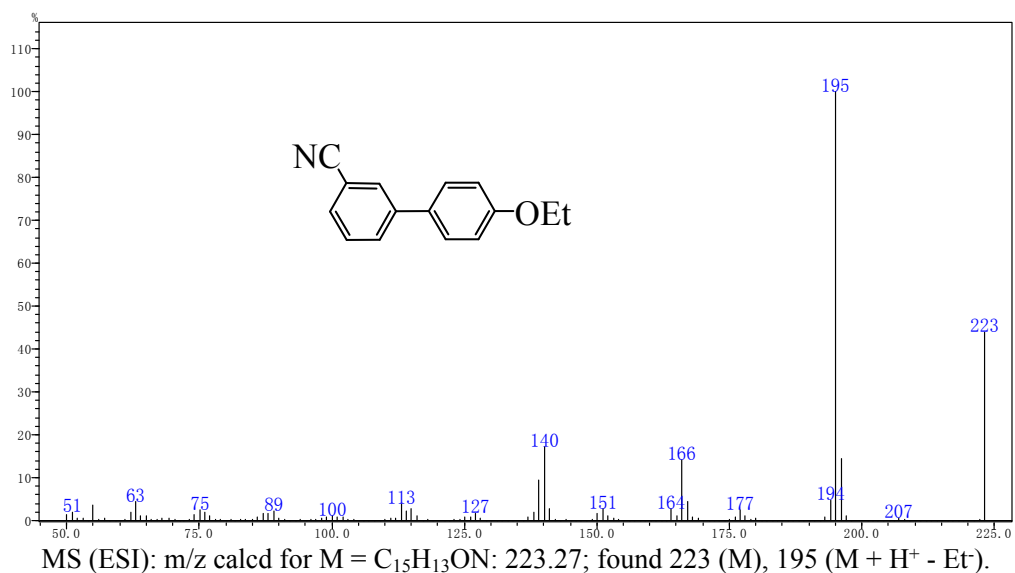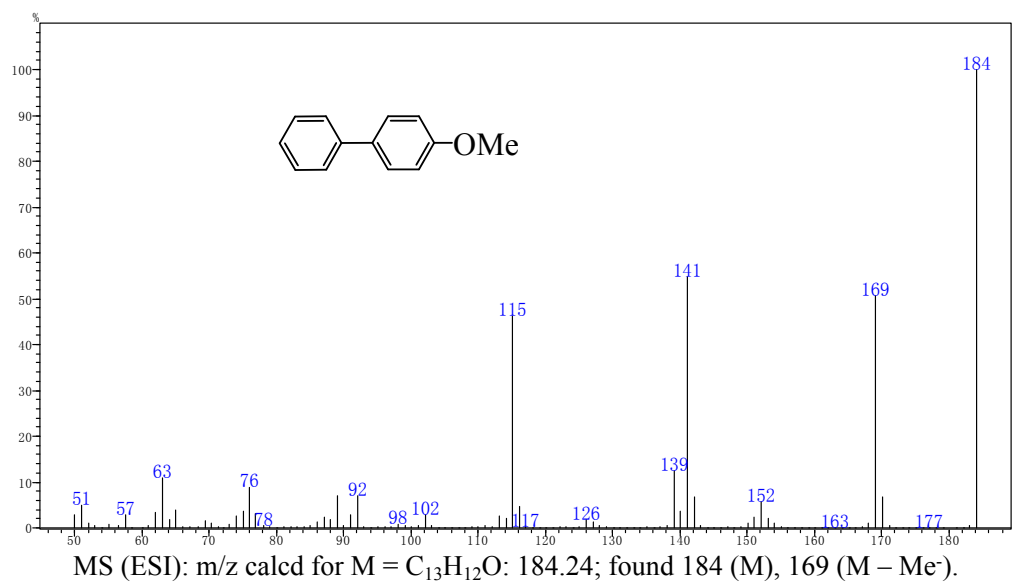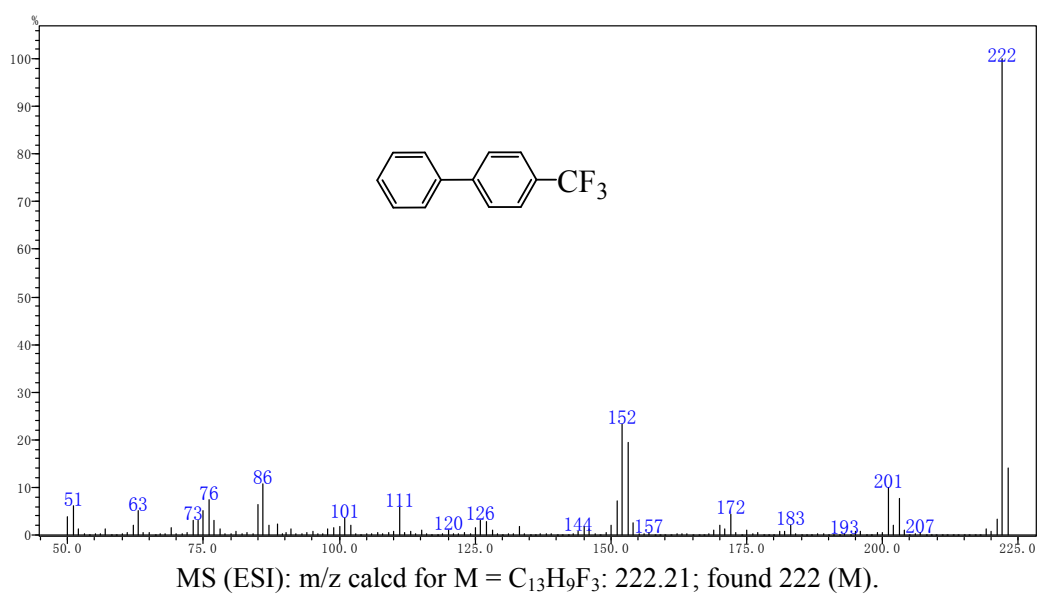

Supplement: c5ta00222b1.pdf [file c5ta00222b1.pdf]
